## 1 **Tyrosine phosphorylation is critical for ACLY activity in lipid metabolism and cancer**

2 Johnvesly Basappa, PhD<sup>1#</sup>, Mahmoud A. ElAzzouny, PhD<sup>2#</sup>, Delphine C.M. Rolland, Pharm D, PhD<sup>1</sup>, ,  
3 Anagh A. Sahasrabudhe, PhD<sup>1</sup>, Kaiyu Ma, PhD<sup>1</sup>, Gleb A. Bazilevsky, PhD<sup>9</sup>, PhD<sup>1</sup>, Steven R. Hwang,  
4 BS<sup>3</sup>, Venkatesha Basrur, PhD<sup>3</sup>, Kevin P. Conlon, BS<sup>3</sup>, Nathanael G. Bailey, MD<sup>10</sup>, John K. Frederiksen,  
5 MD, PhD<sup>3</sup>, Santiago Schnell, PhD<sup>5</sup>, Yeqiao Zhou<sup>1</sup>, David Cookmeyer, BS<sup>7</sup>, Jan M. Pawlicki, PhD<sup>7</sup>, Amit  
6 Dipak Amin<sup>11,12</sup>, James L. Riley, PhD<sup>7</sup>, Robert B. Faryabi, PhD<sup>1,8</sup>, Jonathan H Schatz<sup>11,12</sup>, Kathryn E.  
7 Wellen, PhD<sup>6</sup>, Ronen Marmorstein, PhD<sup>9</sup>, Charles F. Burant, MD, PhD<sup>2</sup>, Kojo S.J. Elenitoba-Johnson,  
8 MD<sup>1,8\*</sup>, Megan S. Lim, MD, PhD<sup>1\*</sup>

9 <sup>1</sup>Department of Pathology and Laboratory Medicine, Perelman School of Medicine, University of Pennsylvania,  
10 Philadelphia, PA USA

11 <sup>2</sup>Department of Internal Medicine, University of Michigan, Ann Arbor, MI USA

12 <sup>3</sup>Department of Pathology, University of Michigan, Ann Arbor, MI USA

13 <sup>4</sup>Department of Biostatistics, University of Michigan, Ann Arbor, MI USA

14 <sup>5</sup>Departments of Computational Medicine, Bioinformatics, University of Michigan, Ann Arbor, MI USA

15 <sup>6</sup>Department of Cancer Biology, Perelman School of Medicine, University of Pennsylvania, Philadelphia, PA USA

16 <sup>7</sup>Department of Microbiology, Perelman School of Medicine, University of Pennsylvania, Philadelphia, PA USA

17 <sup>8</sup>Center for Personalized Diagnostics, Perelman School of Medicine, University of Pennsylvania, Philadelphia, PA  
18 USA

19 <sup>9</sup>Abramson Family Cancer Research Institute, Perelman School of Medicine, University of Pennsylvania,  
20 Philadelphia, PA 19104, USA

21 <sup>10</sup>Department of Pathology, University of Pittsburgh, Pittsburgh, PA 15213

22 <sup>11</sup>Division of Hematology, Department of Medicine, University of Miami, Miami, FL

23 <sup>12</sup>Sylvester Comprehensive Cancer Center, University of Miami, Miami, FL

24 <sup>#</sup>Present address: JVB: Department of Pathology, Fox Chase Cancer Center, Philadelphia, PA 19111

25 MAE: Amgen Inc., 1120 Veterans Blvd, South San Francisco, CA 94080

26

27 **Short title:** Tyrosine phosphorylation of ACLY controls tumor metabolism

28 **Key words:** ACLY, tyrosine phosphorylation, oncogenic kinase, cancer

29 **\* Correspondence:**

30 Megan S. Lim, M.D., Ph.D.

31 Department of Pathology and Laboratory Medicine

32 Perelman School of Medicine

33 University of Pennsylvania

34 Email: [Megan.Lim@uphs.upenn.edu](mailto:Megan.Lim@uphs.upenn.edu)

35 Phone: 215-614-0978

36 FAX: 215 662-7529

37

38 **A fundamental requirement for growth of rapidly proliferating cells is metabolic adaptation to**  
39 **promote synthesis of biomass<sup>1</sup>. ATP citrate lyase (ACLY) is a critical enzyme responsible for**  
40 **synthesis of cytosolic acetyl-CoA, the key building component for *de novo* fatty acid synthesis and**  
41 **links vital pathways such as carbohydrate and lipid metabolism<sup>2</sup>. The mechanisms of ACLY**  
42 **regulation are not completely understood and the regulation of ACLY function by tyrosine**  
43 **phosphorylation is unknown. Here we show using mass-spectrometry-driven phosphoproteomics and**  
44 **metabolomics that ACLY is phosphorylated and functionally regulated at an evolutionary conserved**  
45 **residue, Y682. Physiologic signals promoting rapid cell growth such as epidermal growth factor**  
46 **stimulation in epithelial cells and T-cell receptor activation in primary human T-cells result in rapid**  
47 **phosphorylation of ACLY at Y682. *In vitro* kinase assays demonstrate that Y682 is directly**  
48 **phosphorylated by multiple tyrosine kinases, including ALK, ROS1, SRC, JAK2 and LTK.**  
49 **Oncogenically activating structural alterations such as gene-fusions, amplification or point mutations**  
50 **of ALK tyrosine kinase result in constitutive phosphorylation of ACLY in diverse forms of primary**  
51 **human cancer such as lung cancer, anaplastic large cell lymphoma (ALCL) and neuroblastoma.**  
52 **Expression of a phosphorylation-defective ACLY-Y682F mutant in NPM-ALK+ ALCL decreases**  
53 **ACLY activity and attenuates lipid synthesis. Metabolomic analyses reveal that ACLY-Y682F**  
54 **expression results in increased  $\beta$ -oxidation of <sup>13</sup>C-oleic acid-labeled fatty acid with increased labeling**  
55 **of +2-citrate (p<0.01) and +18-oleoyl carnitine (p<0.001). Similarly, oxygen consumption rate (OCR)**  
56 **is significantly increased in cells expressing ACLY-Y682F (p<0.001). Moreover, expression of ACLY-**  
57 **Y682F dramatically decreases cell proliferation, impairs clonogenicity and abrogates tumor growth**  
58 ***in vivo*. Our results reveal a novel mechanism for direct ACLY regulation that is subverted by**  
59 **multiple oncogenically-activated tyrosine kinases in diverse human cancers. These findings have**  
60 **significant implications for novel therapies targeting ACLY in cancer and metabolism.**

61

62

63

64

65

66

67

68

69 ACLY, a key metabolic enzyme involved in glucose and lipid metabolism, connects glycolysis to lipid  
70 synthesis and plays an important role in metabolism. The conversion of glucose to fatty acids is dependent  
71 on the activity of ACLY which converts mitochondria-derived citrate to cytosolic acetyl-CoA<sup>3</sup>. Acetyl-  
72 CoA is an important precursor not only for lipid synthesis but also for cell growth and proliferation by  
73 promoting the acetylation of histones for gene transcription<sup>4</sup>. Cell proliferation requires a constant supply  
74 of lipids and lipid precursors to fuel membrane biogenesis and protein modification<sup>5</sup>. Glutamine can also  
75 be converted to citrate by the reversal of the Krebs cycle catalyzed by isocitrate dehydrogenase and  
76 aconitase<sup>6</sup>. ACLY supports *de novo* lipid synthesis and knockdown of ACLY reduces the ability of cells  
77 to metabolize glucose to lipids<sup>6</sup>. The role of ACLY in tumor growth has been substantiated by observation  
78 that the small molecule inhibitor of ACLY, SB204990, or shRNA mediated knockdown of ACLY abrogate  
79 the tumor growth in xenograft models<sup>2</sup>.

80  
81 In living cells, the activity of ACLY is dependent on its homotetramerization. The complete crystal structure  
82 of ACLY has been recently solved by two independent groups<sup>7,8</sup>. We and others have also recently reported  
83 cryo-electron microscopy structures of human ACLY, with and without bound acetyl-CoA (Wei X Nat  
84 Struct Mol Biol 2019). ACLY activity is also regulated by post-translational modifications including  
85 ubiquitination, acetylation<sup>9</sup> and serine phosphorylation<sup>10</sup>. While a functional role for serine  
86 phosphorylation via AKT has been demonstrated to enhance ACLY activity and regulate histone acetylation  
87 in human gliomas and prostate tumors<sup>11</sup>, no regulatory role for tyrosine phosphorylation has been  
88 established for ACLY function. Receptor tyrosine kinases are key regulators of critical cellular processes  
89 such as proliferation, differentiation, cell survival, migration, cell-cycle control and metabolism<sup>12</sup>.  
90 Mutational activation of tyrosine kinases resulting in aberrant activation of phosphorylation-mediated  
91 intracellular signaling are causally linked to several diseases including cancer, diabetes, inflammation and  
92 angiogenesis. Tyrosine kinase (including ALK)-mediated post-translational modification of metabolic  
93 enzymes such as pyruvate kinase M2 (PKM2) regulates tumor metabolism<sup>12</sup>. However, a functional role of

94 tyrosine-kinase mediated phosphorylation of ACLY has not been described and the effects on tumor  
95 metabolism and growth are unknown.

96  
97 In our present study, we employed a mass spectrometry-based global phosphoproteomic and metabolomics  
98 strategy to elucidate novel mechanisms of oncogenic tyrosine kinase-mediated regulation of metabolic  
99 pathways. Our results implicate a direct link between tyrosine kinase-mediated signaling and lipid  
100 metabolism that is frequently subverted by oncogenic driver tyrosine kinases in diverse forms of human  
101 cancer.

102  
103 To discover novel mechanisms of phosphotyrosine-mediated oncogenesis, we performed  
104 phosphoproteomic analysis of eighteen lymphoma-derived cell lines including SU-DHL-1, SUP-M2 and  
105 Karpas 299 harboring the t(2;5)(p23;q35) aberration which encodes the oncogenic chimeric fusion tyrosine  
106 kinase NPM-ALK, and generated a compendium of phosphorylated proteins with site mapping of 881  
107 phosphorylated tyrosine peptides. To identify tyrosine phosphorylation events that could be driven by  
108 constitutive ALK activation, we performed clustering of pairwise correlations of 359 phosphotyrosine  
109 residues in the phosphoproteomic dataset that were measured in at least 3 out of the 18 cell lines. We  
110 constructed a heatmap based on Pearson correlation between phosphorylated tyrosine residues that were  
111 correlated with phosphorylation of ALK Y1604 (activated ALK) (Extended Data Fig. 1a). We observed  
112 that several tyrosine residues, ALK Y1584, ALK Y1507, ALK Y1131, ALK Y1096, PKM Y105, SHC1  
113 Y427 and WDR1 Y238 whose phosphorylation have been reported in ALK positive ALCL<sup>12</sup> were highly  
114 correlated with ALK Y1604 phosphorylation (Extended Data Fig. 1a). Notably ACLY Y131 (Pearson  
115 correlation: 0.79, p-value = 0.0001035) and Y682 phosphorylation (Pearson correlation: 0.79, p<1E-4) was  
116 significantly correlated with ALK Y1604 (activated ALK) (Extended Data Fig. 1a). To determine whether  
117 ACLY Y682 is regulated by ALK activity, we subjected the NPM-ALK positive SU-DHL-1 cells to a  
118 selective small molecule inhibitor of ALK (CEP-26939) followed by global phosphoproteomic analysis<sup>13,14</sup>.  
119 We observed reduction of phosphorylation of several ALK tyrosine residues including pY1604, pY1078,

120 pY1092, pY1096, pY1131, pY1507, pY1584 (Extended Data Fig. 1c) and ALK-regulated phosphotyrosine  
121 substrates including PKM2<sup>15,16</sup> WDR1<sup>16</sup> and SHC1<sup>17</sup> (Extended Data Fig. 1b). Importantly, we observed  
122 significant reduction ( $p < 0.05$ ) of ACLY Y682 after ALK inhibition compared to DMSO control (Extended  
123 Data Fig. 1b). Global phosphoproteomic analysis using another ALK inhibitor (Crizotinib) corroborated  
124 the observations with CEP-26939 (Extended Data Fig. 2).

125  
126 Correspondingly, co-transfection of HA-tagged ACLY with either active NPM-ALK or the kinase-  
127 defective NPM-ALK-K210R mutant in HEK293T cells, and anti-HA immunoprecipitates separated on  
128 SDS-PAGE (Extended Fig. 1d) followed by mass spectrometry analysis revealed phosphorylation of ACLY  
129 Y131 and Y682 only in the presence of active NPM-ALK (Extended Data Fig. 1e). Cross-species sequence  
130 alignment indicated that ACLY Y682 is highly conserved from humans to *C. elegans* (Extended Data Fig.  
131 1f). These results led us to hypothesize that ACLY is novel substrate of ALK tyrosine kinase. To assess the  
132 preferential site of NPM-ALK-mediated phosphorylation of ACLY, we generated HA-tagged ACLY-WT,  
133 ACLY-Y131F and ACLY-Y682F mutants which were expressed alone, with active NPM-ALK or kinase-  
134 defective NPM-ALK-K210R in HEK293T cells. Western blotting of the ACLY immunocomplex with an  
135 anti-phosphotyrosine antibody revealed that NPM-ALK preferentially phosphorylates ACLY at Y682 in  
136 comparison to ACLY Y131 residue (Extended Data Fig. 1g). These results were corroborated by direct *in*  
137 *vitro* kinase assays (Extended Data Fig. 1h). Taken together, these studies indicate that NPM-ALK directly  
138 phosphorylates ACLY Y682. Therefore, we focused our study on exploring the role of ACLY Y682  
139 phosphorylation and its impact on tumor metabolism.

140  
141 To further explore the effect of crizotinib on ACLY Y682 phosphorylation, 2 ALK+ ALCL cell lines (SU-  
142 DHL-1, DEL) and a neuroblastoma cell line (NB1) were treated with crizotinib and lysates were subjected  
143 to immunoblot. Western blotting of the lysates with an anti-pACLY Y682 antibody generated to interrogate  
144 its phosphorylation status revealed decreased phosphorylation of ACLY at Y682 with crizotinib treatment  
145 in comparison to DMSO control (Fig. f,g). Furthermore, the anti-pACLY Y682 antibody was used to

146 assess the level of phosphorylated ACLY in neoplastic and physiologic conditions. Total protein lysates  
147 derived from ALK+ ALCL and ALK- T-cell lymphoma cell lines were immunoblotted with anti-pACLY  
148 Y682 which revealed constitutive phosphorylation of ACLY at Y682 in ALK+ ALCLs, but not in ALK-  
149 T-cell lymphomas (Fig. 1a). Immunohistochemistry (IHC) performed on human tissue biopsies derived  
150 from ALK+ ALCL (n=20) and ALK- ALCL (n=28) patients using pACLY Y682 and ALK antibodies (Fig.  
151 1b) revealed that (19/20) 95% of ALK+ ALCLs expressed pACLY-Y682, while (6/28) 21.42% of ALK-  
152 ALCL expressed pACLY Y682 demonstrating significant correlation between phosphorylation of ACLY  
153 at Y682 and ALK expression ( $X^2=31.35$ ; p-value < 0.01).

154  
155 Next, we generated an ALK+ ALCL cell line (DEL) with lentivirus-mediated stable expression of empty  
156 vector, HA-tagged ACLY-WT or ACLY-Y682F. Immunoblotting with pACLY-Y682 antibody revealed  
157 that phosphorylation of ACLY Y682 was increased in DEL cells stably expressing ACLY-WT, while cells  
158 expressing ACLY-Y682F exhibited basal ACLY Y682 phosphorylation which was comparable to vector  
159 (Fig. 1c). Additionally, we stably transduced active NPM-ALK and kinase defective NPM-ALK-K210R  
160 constructs in human primary T cells and lysates were prepared 8 days after transduction. Immunoblotting  
161 with pACLY-Y682 antibody revealed phosphorylation of ACLY Y682 only in active NPM-ALK  
162 transduced human primary T cells (Fig. 1e).

163  
164 To evaluate the impact of ACLY Y682 phosphorylation on its enzymatic activity, we employed a malate  
165 dehydrogenase-coupled assay<sup>18</sup> in which protein lysates were used as a source of ACLY. Assessment of  
166 enzymatic activity revealed significantly decreased ACLY activity in cells expressing ACLY-Y682F in  
167 comparison to ACLY-WT (Fig.3c). Pharmacologic inhibition of ALK using crizotinib at 300 nM for 6  
168 hours in 2 ALK+ ALCL cell lines, SU-DHL-1 and DEL resulted in reduction of ACLY activity by >20%  
169 and >25%, respectively (p <0.05) (Fig. 3a,b). Taken together, these results indicate that Y682  
170 phosphorylation is critical for ALK-mediated ACLY activity.

171

172 To further explore the effect of active NPM-ALK on endogenous ACLY Y682 phosphorylation and its  
173 enzymatic activity, we transfected HEK293T cells with empty vector, active NPM-ALK and kinase-  
174 defective NPM-ALK-K210R constructs. Western blotting revealed that active NPM-ALK phosphorylated  
175 ACLY at Y682 but the kinase-defective NPM-ALK-K210R did not (Fig. 1d). Further, the enzymatic  
176 activity of ACLY was dependent on the kinase activity of NPM-ALK. Indeed, cells expressing kinase-  
177 defective NPM-ALK-K210R exhibited basal levels of ACLY activity comparable to that seen in empty  
178 vector-transfected cells (Fig. 3d). Correspondingly, we further explored the effect of active NPM-ALK on  
179 endogenous ACLY Y682 phosphorylation in human CD4<sup>+</sup> cells with empty vector, active NPM-ALK and  
180 kinase-defective NPM-ALK-K210R constructs and observed similar results (Fig. 1e).

181  
182 To evaluate whether NPM-ALK directly phosphorylates ACLY, we expressed recombinant GST-tagged  
183 ACLY-WT and ACLY-Y682F peptides which were co-incubated with active NPM-ALK or kinase-  
184 defective NPM-ALK-K210R immunopurified from HEK293T cells that were transfected with respective  
185 constructs in *in vitro* kinase assay conditions. Immunoblotting using anti-pACLY Y682-specific antibody  
186 revealed that ACLY is phosphorylated at Y682 by NPM-ALK but not by the kinase-defective NPM-ALK  
187 -K210R) (Fig. 2a).

188  
189 To evaluate whether NPM-ALK interacts with ACLY, we transiently transfected vectors encoding HA-  
190 tagged ACLY-WT and ACLY-Y682F alone or with active NPM-ALK in HEK293T cells. Immunoblotting  
191 of ALK-immunoprecipitation (IP) with anti-HA demonstrated that ACLY-WT and ACLY-Y682F interact  
192 with NPM-ALK (Fig. 1g). Further, reciprocal IP with HA revealed NPM-ALK interaction with ACLY-WT  
193 and ACLY-Y682F (Fig. 1h). To further evaluate whether endogenous NPM-ALK interacts with  
194 endogenous ACLY, we subjected SU-DHL-1 cell lysates for ALK-immunoprecipitation (IP) with ALK  
195 antibody and IgG controls and probed with anti-ACLY antibody. These data indicate that ACLY interacts  
196 with NPM-ALK in endogenous conditions (Fig. 1j).

197

198 The gene encoding ALK tyrosine kinase is targeted by multiple oncogenic alterations including  
199 translocations/gene fusions, gene amplifications and point mutations that lead to its constitutive activation  
200 in diverse human cancers<sup>19</sup>. To determine whether other ALK fusion proteins in addition to NPM-ALK  
201 constitutively phosphorylate ACLY Y682, we performed western blot analysis of a non-small-cell lung  
202 cancer-derived cell line H3122<sup>20</sup> that expresses the echinoderm microtubule-associated protein-like 4-  
203 anaplastic lymphoma kinase (EML4-ALK) fusion protein. The results revealed that EML4-ALK  
204 phosphorylates ACLY Y682 in H3122 cell line (Extended Data Fig. 3a). We then performed *in vitro* kinase  
205 assays to evaluate whether EML4-ALK directly phosphorylates ACLY. To this end, we incubated  
206 recombinant GST-tagged ACLY-WT and ACLY-Y682F peptides with immunopurified EML4-ALK from  
207 HEK293T cells transfected with *EML4-ALK* followed by immunoblotting with anti-pACLY Y682. The  
208 results revealed that EML4-ALK directly phosphorylates ACLY Y682 (Fig. 2b). Immunohistochemistry  
209 (IHC) using tissue microarrays (TMA) revealed positive reactivity for pACLY Y682 in *EML4-ALK*+  
210 primary lung cancer (n=5) (Extended Data Fig. 3b). Furthermore, we detected constitutive phosphorylation  
211 of ACLY Y682 in the neuroblastoma cell line (NB1)<sup>21</sup> (Fig. 1g) which is characterized by *ALK*  
212 amplifications.

213  
214 To investigate whether point mutations in full-length ALK also promote ACLY Y682 phosphorylation, we  
215 used recombinant ALK R1275Q which is observed in sporadic and familial neuroblastoma<sup>22</sup> and ALK  
216 C1156Y a known crizotinib resistance mutation in *EML4-ALK* positive lung cancer<sup>23</sup>. *In vitro* kinase  
217 assays revealed increased Y682 phosphorylation in GST-ACLY in the presence ALK R1275Q and ALK  
218 C1156Y when compared to wild type full-length ALK (Fig. 2c). In this regard, we quantified the  
219 densitometry values and observed a seven-fold increase in ACLY Y682 phosphorylation in the presence of  
220 *ALK* mutations (Fig. 2d). These findings indicate that activating point mutations in full length ALK  
221 (R1275Q) increase Y682 phosphorylation of ACLY and that the crizotinib resistance mutation (C1156Y)  
222 led to enhanced ALK-mediated phosphorylation of ACLY Y682. The results indicate that diverse genomic  
223 mechanisms of oncogenic ALK activation lead to constitutive phosphorylation of ACLY Y682.



224  
225 Having observed robust phosphorylation of ACLY Y682 in cells harboring *ALK* gene fusions,  
226 amplifications and activating mutations, we sought to investigate whether ACLY could serve as a substrate  
227 for other tyrosine kinases. *In vitro* kinase assays using recombinant proteins showed that multiple tyrosine  
228 kinases namely SRC (Fig. 2e), JAK2 (Fig. 2f), ROS1 (Fig. 2g) and LTK (Fig. 2h) directly phosphorylate  
229 ACLY Y682. Furthermore, IHC demonstrated ACLY Y682 phosphorylation in tissue biopsies of *EGFR*  
230 mutant lung cancer (n=5) (Extended Data Fig. 3d) and HER2-amplified breast cancer (n=5) (Extended Data  
231 Fig. 3c).

232  
233 Given our observation of direct and constitutive phosphorylation of ACLY Y682 by multiple oncogenic  
234 tyrosine kinases, we reasoned that physiologic cellular growth signals such as growth factor stimulation  
235 and T-cell receptor signaling may regulate the tyrosine phosphorylation of ACLY Y682. To test this  
236 hypothesis, we stimulated two epithelial cell lines (HeLa and A549) with epidermal growth factor (EGF)  
237 and performed western blotting with anti-pACLY Y682. Rapid phosphorylation of ACLY Y682 was  
238 observed upon EGF stimulation in a time-dependent fashion in both epithelial cell contexts (Fig. 1,k,l). To  
239 further substantiate a role for Y682 phosphorylation in the regulation of physiologic processes, we  
240 evaluated pACLY Y682 in primary peripheral blood T cells following stimulation with anti-CD3/CD4<sup>24,25</sup>.  
241 These experiments revealed rapid and time-dependent phosphorylation of ACLY Y682 (Fig. 1m). Taken  
242 together, these results indicate that diverse physiologic stimuli engaging multiple tyrosine kinase-mediated  
243 pathways regulate the phosphorylation of ACLY Y682.

244  
245 Having established that phosphorylation of ACLY Y682 regulates its enzymatic activity, we sought to  
246 evaluate its impact on citrate metabolism. We performed <sup>13</sup>C-glucose labeling analysis using high-  
247 performance liquid chromatography-tandem mass spectrometry (LC-MS/MS) in DEL cells pretreated with  
248 DMSO and crizotinib (Schematic shows <sup>13</sup>C-glucose derived metabolites where carbons are depicted as  
249 (red circles) Fig. 3e). As shown in Fig. 2f, ALK inhibition led to time-dependent accumulation of <sup>13</sup>C<sub>2</sub>-

250 citrate (m+2 red) in comparison to DMSO control. This was associated with concomitant time-dependent  
251 reduction of  $^{13}\text{C}_2$ -acetyl-Co-A (m+2 red) in response to ALK inhibition by crizotinib (Fig. 2g). Similar  
252 results were observed in another ALCL-derived cell line, SUD-HL1 (Extended Data Fig. 4b). This was  
253 associated with concomitant time-dependent reduction of  $^{13}\text{C}_2$ -acetyl-Co-A (m+2 red) and  $^{13}\text{C}_2$ -malonyl-  
254 co-A (m+2 red) in response to ALK inhibition (Extended data Fig.5c,d). Similarly, stable expression of the  
255 ACLY Y682F mutant in the ALK+ALCL cell line (DEL) led to accumulation of  $^{13}\text{C}_2$ -citrate (m+2) and  
256 reduced  $^{13}\text{C}_2$ -acetyl-Co-A (m+2) compared to ACLY-WT (Fig. 3h,i).

257  
258 We next explored the functional role of ALK-mediated ACLY Y682 phosphorylation in *de novo*  
259 lipogenesis using metabolomic profiling. DEL cells were cultured in the presence of  $^{13}\text{C}$ -glucose or  $^{13}\text{C}$ -  
260 glutamine for 24 hours and lipids were extracted and converted into fatty acid methyl esters analyzed by  
261 GC-MS (Fig. 3j). These analyses demonstrated that ALK enhances the rate of incorporation of  $^{13}\text{C}$ -glucose  
262 and  $^{13}\text{C}$ -glutamine derived  $^{13}\text{C}$ - into palmitate in DEL cells (Fig. 3k,l). This was more pronounced for  
263 glutamine-derived  $^{13}\text{C}$  incorporation (+16) into cellular palmitate relative to glucose-derived  $^{13}\text{C}$   
264 incorporation (+10 (Fig. 3l). These data indicate that NPM-ALK regulates *de novo* lipid synthesis. The  
265 effect of ACLY on *de novo* lipogenesis was then evaluated using DEL cells stably expressing ACLY-WT  
266 and ACLY-Y682F cells using similar experimental conditions. As shown in Fig. 3m and Fig. 3n, these  
267 experiments revealed that ACLY-Y682F led to significant decrease in  $^{13}\text{C}$  incorporation into cellular  
268 palmitate ( $p < 0.001$ ) in either  $^{13}\text{C}$ -glucose- or  $^{13}\text{C}$ -glutamine-cultured conditions. Taken together, these  
269 results indicate that ACLY Y682 phosphorylation promotes *de novo* lipogenesis.

270  
271 To determine whether phosphorylation of ACLY Y682 impacts fatty acid oxidation, DEL cells stably  
272 transduced to express ACLY-WT or ACLY-Y682F mutant were cultured in  $^{13}\text{C}$ -oleic acid-containing  
273 media for LC-MS/MS analysis to quantitate the intermediates derived from  $\beta$ -oxidation of fatty acid  
274 (Extended Data Fig. 4e). Complete oxidation of  $^{13}\text{C}$ -oleic acid in mitochondria yields eight acetyl units  
275 which are incorporated in the form of citrate ( $^{13}\text{C}_2$ -citrate) labeled on two carbons<sup>26</sup>. LC-MS/MS analyses

276 demonstrated increased  $^{13}\text{C}_2$ -citrate and oleoyl carnitine (m+18) metabolite levels in cells expressing  
277 ACLY-Y682F when compared to ACLY-WT (Extended Data Fig. 4f,g). Taken together, these studies  
278 indicate that ACLY Y682 phosphorylation decreases fatty acid oxidation.

279  
280 The ability to adapt oxygen consumption requirements to favor generation of biomass irrespective of  
281 ambient oxygen conditions is a critical necessity during rapid physiologic and oncogenic cell growth<sup>27-29</sup>.  
282 To evaluate the role of ACLY Y682 phosphorylation on oxygen consumption rates (OCR), we measured  
283 the basal OCR in DEL cell lines stably expressing ACLY-WT and ACLY-Y682F<sup>30</sup> in the presence of  
284 palmitate or oleic acid. These studies showed increased basal OCR in ACLY Y682F cells when compared  
285 to ACLY-WT cells (Extended Data Fig. 4h). Taken together these data indicate that phosphorylation of  
286 ACLY Y682 favors generation of lipid biomass and anabolic metabolism.

287  
288 We investigated the effect of small molecule inhibitors of ACLY (BMS 303141)<sup>31</sup> and ALK (crizotinib)<sup>145</sup>  
289 on cell proliferation of ALK+ALCL cell lines DEL, SUPM2 and SUP-CR500 for 24, 48 and 72 hours. Cells  
290 treated with the ACLY inhibitor alone or in combination with crizotinib showed significant reduction of  
291 cell proliferation when compared to DMSO control, similar to ALK inhibition (Fig. 4a,b,c). Similarly, we  
292 investigated the functional role of phosphorylation of ACLY Y682 in DEL cells stably expressing vector,  
293 ACLY-WT or ACLY-Y682F and assessed cell proliferation over 24, 48 and 72 hours. Cells expressing  
294 ACLY-Y682F showed significant reduction of proliferation (>69%,  $p < 0.005$ ) when compared to those  
295 expressing ACLY-WT (Fig. 4d).

296  
297 We employed methylcellulose-based colony formation assays to assess the clonogenic potential of ALK  
298 positive DEL cells expressing ACLY-WT and ACLY-Y682F mutant using vector only-expressing cells as  
299 control. These assays revealed significantly higher (>70%,  $p < 0.005$ ) colony formation in ACLY-WT when  
300 compared to ACLY-Y682F mutant cells (Fig. 4e,f). To evaluate *in vivo* tumorigenicity, we established  
301 xenografts of DEL cells stably expressing vector control (n=5), ACLY-WT (n=5) and ACLY-Y682F (n=5)

302 by subcutaneous injection of  $1 \times 10^7$  cells into SCID-BEIGE mice and examined tumor growth over time.  
303 After 21 days, all mice xenografted with vector only and ACLY-WT developed large tumors ( $>550 \text{ mm}^3$   
304 volume). By contrast, only one out of five mice injected with ACLY-Y682F cells developed a small tumor  
305 *in vivo* while the remaining four mice were tumor-free. The tumor sizes (Fig. 4g) and volumes (Fig. 4h)  
306 show significantly diminished tumor growth in ACLY-Y682F expressing DEL cells. Accordingly, whereas  
307 all mice harboring ACLY-Y682F expressing DEL xenografts were alive beyond 34 days, all animals  
308 xenografted with ACLY-WT and vector-only expressing DEL cells did not survive beyond 23 days (Fig.  
309 4i). Taken together, these results indicate that phosphorylation of ACLY Y682 is critical for tumor growth.  
310 Fig. 4j represents the working model in which multiple physiologic and oncogenic tyrosine kinases directly  
311 phosphorylate ACLY Y682 to promote lipid metabolism and cellular proliferation.

312  
313 We show here that phosphotyrosine-mediated regulation of ACLY activity plays a critical functional role  
314 in the generation of acetyl-CoA and subsequent lipid metabolism that contribute to tumor growth. Given  
315 that cell proliferation requires *de novo* fatty acid synthesis, tyrosine kinase-mediated regulation of ACLY  
316 activity provides a direct mechanism for connecting growth factors and other cellular signals such as  
317 lymphocyte antigen receptors signaling to lipid metabolism in order to support membrane synthesis  
318 required for cell growth. In this regard, our studies demonstrate that Y682 phosphorylation of ACLY is  
319 regulated by physiologic signals such as EGF and CD3-mediated T-cell activation. These findings suggest  
320 that reversible physiological tyrosine phosphorylation at ACLY Y682 may serve as a switch that directly  
321 controls the ability of critical cellular events to immediately trigger lipid synthesis required for cell  
322 proliferation. Oncogenically-activated tyrosine kinases are among the most common primary drivers of  
323 diverse cancers and may subvert this mechanism by constitutive phosphorylation of Y682 ACLY and  
324 stimulation of ACLY activity to promote lipid synthesis and tumor proliferation and may contribute to  
325 acquired resistance to small molecular inhibitors. These observations indicate that direct inhibition of  
326 ACLY Y682 phosphorylation may offer an attractive therapeutic opportunity for diverse cancers.

327

328

329

## 330 **METHODS**

331 **Antibody production:** ACLY Y682 phospho-specific, rabbit polyclonal antibody was raised against a

332 KLH-coupled peptide (RTTDGVpYEGVAIG) which corresponds to residue Y682 of human ACLY.

333 Antibody was generated and affinity purified by Pierce Protein Research Services, Rockford, IL.

334 **Cell lines:** Five ALK+ ALCL cell lines (SU-DHL1, DEL, Karpas 299, SUP-M2 and SR786), 2 ALK-

335 ALCL cell lines (MAC1, MAC2A), 2 cutaneous T cell lymphoma (CTCL) cell lines (MYLA, HH), and

336 human embryonic kidney epithelial cell line (HEK293T) were maintained at 37°C in RPMI 1640 (Life

337 Technologies) and DMEM supplemented with 10% fetal bovine serum and Penicillin and Streptomycin

338 (1mM), in a humidified atmosphere containing 5% CO<sub>2</sub>, respectively.

339 **HA-tagged ACLY-WT and ACLY-Y682F overexpression in HEK293T cells:** ACLY was transiently

340 transfected in HEK293T cells using Polyjet (SignaGen Lab) with pLenti vector and pLenti-GIII-CMV-

341 Human-ACLY HA-tagged constructs (Abmgood, Burlington, Canada) by following the manufacturer's

342 guidelines. Empty vector lacking the ACLY sequence was used as control. ALCY-Y682F mutation was

343 generated by Dpn I-mediated site-directed mutagenesis using Phusion High-Fidelity DNA Polymerase

344 using ACLY-HA as a template.

345 **ACLY-WT and ACLY-Y682F mutant lentivirus transduction in DEL cells:** To stably overexpress

346 ACLY-WT and ACLY-Y682F mutant form of human full length constructs in DEL, lentivirus transduction

347 particles were generated using HEK293T packaging cells transfected by vector plasmid constructs such

348 as psPAX2 and pMD2.G containing full length human ACLY-WT and ACLY-Y682F mutant with HA

349 and GFP tags. The virus particles were transduced into DEL cell line and expanded for three passages;

350 GFP-positive cells were subjected to fluorescence-activated cell sorting (FACS) to obtain cells stably

351 expressing ACLY-WT and ACLY-Y682F mutant.

352 **Immunoblotting analysis:** Proteins were extracted using RIPA lysis buffer containing a cocktail of  
353 protease and phosphatase inhibitors. For western blotting, 50 µg of total cell proteins were subjected to  
354 SDS-PAGE in 10 or 4-20 % NuPAGE gradient gels under reducing conditions and transferred onto a  
355 nitrocellulose membrane. The blots were blocked in 5 % skimmed milk in TBST and probed with primary  
356 antibodies overnight. The blots were developed using ECL western blotting detection reagent (GE  
357 Healthcare).

358 **Immunoprecipitation and pull down assays:** HA-tagged proteins were immunoprecipitated from  
359 HEK293T cells co-transfected with ACLY-WT-HA, ACLY-Y682F-HA with NPM-ALK, NPM-ALK-  
360 K201R or EML4-ALK cell lysates by incubation with agarose-HA antibody overnight. For ALK  
361 immunoprecipitations, cell lysates from foresaid conditions were incubated with anti-ALK antibody (1:200)  
362 and protein A/G agarose overnight. Beads were washed in RIPA buffer and analyzed by immunoblotting.

363 **Phosphopeptide analysis of ACLY by mass spectrometry (MS) experiments:** HA-tagged ACLY-WT  
364 alone, or with active NPM-ALK or kinase-defective NPM-ALK-K210R was immunoprecipitated with HA  
365 antibody and resolved on SDS-PAGE (NuPAGE 4-20%), the gel was stained with G250 and the bands were  
366 excised. Phosphotyrosine containing peptides were purified and subjected to tandem mass spectrometry for  
367 protein identification.

368 **Co-immunoprecipitation and immunoblotting:** HEK293T cells were grown in 10-cm plates. After 24  
369 hours, cells were transiently transfected with HA-tagged ACLY-WT, ACLY-Y682F, active NPM-ALK  
370 kinase-defective NPM-ALK-K210R, construct expressing EML4-ALK [E6A20] and the empty vector  
371 (pCDH-puro) using Polyjet transfection reagent (Signagen) as per the manufacturer's instructions.  
372 Plasmids used to express active NPM-ALK and kinase defective NPM-ALK-K210R has been described  
373 previously<sup>24</sup>. The constructs expressing EML4-ALK [E6A20] and the empty vector (pCDH-puro) were  
374 generously provided by Dr. Robert C. Doebele, University of Colorado, Denver, CO. Forty-four hours  
375 post-transfection, cells were lysed in 1000 µl of RIPA lysis buffer/plate by sonication. Lysates were  
376 centrifuged (15,000 × g, 10 min, 4°C) and the supernatant was incubated overnight at 4°C with anti-HA or  
377 anti-ALK antibodies. Fifty µl of protein A/G PLUS-agarose (Santa Cruz Biotechnology) were added for 6

378 h. After four washes with RIPA lysis buffer, the precipitated proteins were heated in 2 X SDS-PAGE sample  
379 buffers at 95°C for 6 min and analyzed by western blotting. Membranes were blocked in TBST plus 5%  
380 defatted milk followed by overnight incubation at 4°C with primary antibodies as indicated, i.e. anti-HA,  
381 anti-pACLY Y682, anti-ALK and anti-pALK Y1604. Incubation with the appropriate secondary HRP-  
382 labeled antibody was followed by detection with ECL western blotting substrate (Roche Applied Science).

383 ***In vitro* kinase assay using NPM-ALK:** Immunoprecipitation of ALK was carried out as described above.  
384 Sepharose-bound immune complexes in lysis buffer were washed and resuspended in kinase buffer (50 mM  
385 Tris.HCl, pH 7.5, 10 mM MgCl<sub>2</sub>, 1 mM sodium fluoride, 1 mM sodium orthovanadate, 1mM DTT and 200  
386 μM ATP). GST-ACLY-WT and GST-ACLY-Y682F recombinant peptides were expressed in *E.coli*, BL21  
387 strain and purified by using GST-agarose beads and eluted. Purified GST-ACLY and GST-Y682F peptides  
388 were incubated with ALK immunocomplex from NPM-ALK and NPM-ALK (K210R) co-transfected cell  
389 lysates in the presence of kinase buffer and 0.5 mM ATP for 30 min at 30°C. Samples were heated at 95°C  
390 for 5 min and separated on a 4-20% gel by SDS-PAGE and followed by western blotting and probed with  
391 anti-GST, anti-pACLY Y682, anti-ALK and anti-pALK Y1604 antibodies.

392 ***In vitro* kinase assays using multiple oncogenic tyrosine kinases:** Recombinant GST-ACLY-WT and  
393 GST-ACLY-Y682F peptides were subjected to *in vitro* kinase assay using various oncogenic tyrosine  
394 kinases as described above. In brief, GST-ACLY-WT and GST-ACLY-Y682F beads were incubated with  
395 100 ng of recombinant ALK, ALK C1156Y (mutated in EML4-ALK), ALK R1275Q (mutated in  
396 neuroblastoma), SRC kinase, JAK2, ROS1 and LTK for 30 min at 30°C in kinase buffer. Samples were  
397 heated at 95°C for 5 min, separated on a 4-20% gel by SDS-PAGE and followed by western blotting using  
398 anti-GST, anti-pACLY Y682, anti-ALK and anti-pALK Y1604, anti-pSRC Y416, anti-pJAK2 Y1007, anti-  
399 pROS1 Y2274 and anti-LTK antibodies.

400 **ACLY enzymatic activity assay:** ACLY enzyme activity was determined using the malate dehydrogenase  
401 (MDH)-coupled method as described earlier with little modification<sup>9</sup>. Briefly, cell lysates were incubated  
402 in reaction buffer containing 10 mM potassium citrate, 10 mM MgCl<sub>2</sub>, 1 mM DTT, 10 U malic  
403 dehydrogenase, 0.3 mM CoASH, 0.1 mM NADH in 50 mM Tris (pH 7.5) and the reaction was initiated by

404 adding 0.2mM ATP in a final volume of 100 ul, incubated at 37°C, and NADH oxidation was continuously  
405 monitored every 5 min for 60 min using a microplate reader. To measure the effect of a small molecule  
406 inhibitor of ALK, DEL and SU-DHL1 cells were pretreated with crizotinib at 300 nM for 6 hours. For the  
407 control experiments, lysis buffer was used in place of cell lysates for nonspecific NADH oxidation. The  
408 relative ACLY activities were calculated by normalization to the total protein abundance of the extracts in  
409 triplicate.

410 **Immunohistochemistry (IHC) for pY682-ACLY expression:** Formalin fixed, paraffin sections were cut  
411 at 5 microns and rehydrated to water. Heat induced epitope retrieval was performed with FLEX TRS Low  
412 pH Retrieval buffer (6.10) for 20 minutes. After peroxidase blocking, the rabbit anti p-ACLY Y682  
413 antibody was applied at a dilution of 1:250 at room temperature for 60 minutes. The FLEX HRP EnVision  
414 System was used for detection. DAB chromagen was then applied for 10 minutes. Slides were  
415 counterstained with hematoxylin.

416 **<sup>13</sup>C-glucose isotopomer-labeled metabolomics analysis:** DEL cells were treated with DMSO or crizotinib  
417 (300 nM) for 3 hours in complete RPMI media containing 10% FBS before <sup>13</sup>C-glucose flux analysis. Cells  
418 were washed in PBS and resuspended at  $5 \times 10^6$  cells in glucose-free RPMI media containing 10% FBS in  
419 the presence or absence of crizotinib for each condition (N=3). The cells were supplemented with U-<sup>13</sup>C-  
420 glucose at final concentration of 15 mM and incubated for 30 min and 60 min at 37°C incubator. Cell pellets  
421 were snap frozen in liquid nitrogen and processed for LC-MS/MS analysis as detailed in the supplementary  
422 materials.

423 **<sup>13</sup>C-glucose and <sup>13</sup>C-glutamine labeling lipid synthesis metabolomics analysis:** DEL cells were grown  
424 in the presence of DMSO or crizotinib (50 nM) for 24 hours in complete RPMI media containing 10% FBS  
425 and <sup>13</sup>C-glucose (25mM) in three biological replicates. After 24 hours, equal amount of cells ( $5 \times 10^6$  cells)  
426 from DMSO and crizotinib-treated flasks were spun down and cell pellets were snap frozen in liquid  
427 nitrogen. Similarly, DEL cells were grown in the presence of DMSO or crizotinib (50 nM) for 24 hours in  
428 glutamine-free RPMI media containing 10% FBS and <sup>13</sup>C-glutamine (3mM) in three biological replicates.  
429 After 24 hours, equal number of cells ( $5 \times 10^6$  cells) from DMSO and crizotinib-treated flasks were spun



430 down and cell pellets were snap frozen in liquid nitrogen and processed for gas chromatography/mass  
431 spectrometry (GC/MS) for analysis of lipid synthesis.

432 **Fatty acid oxidation:** DEL cells stably expressing ACLY-WT and ACLY-Y682F ( $5 \times 10^6$  cells/condition)  
433 were seeded in serum/glucose free RPMI medium for 3 hours before the experiment. After 3 hours of  
434 starvation, cells were incubated in the presence of  $400 \mu\text{M}$   $^{13}\text{C}$ -palmitic acid (Sigma) or  $400 \mu\text{M}$   $^{13}\text{C}$ -oleic  
435 acids (Sigma) with  $2.5 \text{ mM}$  glucose in RPMI medium for 2 hours. Cells were immediately snap-frozen  
436 using liquid nitrogen and kept at  $-80^\circ\text{C}$  until extraction of metabolites, as described previously<sup>25</sup>.

437 **Oxygen consumption rate:** Oxygen consumption rate (OCR) was measured using a Seahorse XF24  
438 extracellular flux analyzer (Seahorse Bioscience) as described by the manufacturer protocol. Twenty four  
439 hours before the experiment, DEL cells stably expressing ACLY-WT and ACLY-Y682F were cultured in  
440 complete RPMI medium. On the day of metabolic flux analysis, the culture medium was replaced with  $675$   
441  $\mu\text{l}$  of unbuffered serum/glucose free RPMI and seeded on Seahorse XF-24 plates at a density of  $1 \times 10^5$   
442 cells per well and incubated at  $37^\circ\text{C}$  in a non- $\text{CO}_2$  incubator for 1 hour. All injection reagents were adjusted  
443 to pH 7.4. Baseline rates were measured at  $37^\circ\text{C}$  before injecting final volume of  $1.0 \text{ mM}$  glucose and  $400$   
444  $\mu\text{M}$  palmitate or oleate. After the addition of  $1.0 \text{ mM}$  glucose and each fatty acid, OCR readings were  
445 automatically calculated from five replicates by the Seahorse XF-24 software.

446 **EGF stimulation of HeLa and A549 cells:** HeLa and A549 cells were grown in 10-cm plates in complete  
447 DMEM and RPMI media, respectively for 48 hours. At 80% confluency, cells were serum starved for 16  
448 hours. Cells were stimulated with  $2.5 \text{ ng/ml}$  EGF for 5, 10 and 20 minutes. Cells were then processed for  
449 western blotting as described above with antibodies for anti-EGFR, anti-phospho EGFR, anti-ACLY, anti-  
450 ERK1/2 and anti-pERK1/2 and anti-pACLY Y682.

451 **Anti-CD3/CD4 stimulation of human primary T cells:** Human primary T cells were purified from whole  
452 blood of healthy donors provided by the Human Immunology Core facility at the University of  
453 Pennsylvania. For each condition,  $6 \times 10^6$  cells were stimulated with  $10\mu\text{g/ml}$  of anti-CD3/CD4 antibody in  
454 PBS at room temperature for 5, 10 and 20 minutes. Cell lysates were processed for western blotting as

455 described above. The blots were probed with primary antibodies as indicated, i.e. anti-ACLY, anti-phospho  
456 ACLY Y682, anti-ZAP70 and anti-pZAP70.

#### 457 **Culturing, stimulation, and transduction of primary human CD4+ Cells**

458 Primary CD4+T cells were acquired from anonymous donors through the University of Pennsylvania's  
459 Human Immunology Core using an institutional review board-approved protocol. Primary human CD4+ T  
460 cells expressing NPM-ALK or NPM-ALK-K210R (NPM-ALK-KD) were prepared as previously  
461 described<sup>26</sup>. Transduced T cells were diluted to a concentration of  $3.0 \times 10^5$  cells/mL every 2 to 3 days. The  
462 cells were counted using the electrical sensing zone method (Multisizer 3, Beckman Coulter, Indianapolis,  
463 IN)

#### 464 **Preparation of cell lysates from primary human CD4+ T cells**

465 Untransduced CD4+ T cells or CD4+ T cells expressing NPM-ALK or NPM-ALK-K210R were pelleted  
466 and re-suspended in 1 mL of Lysis buffer, Protease inhibitor (75 mM NaCl, 25 mM Tris, 2.5 mM EDTA,  
467 5 mM NaF, 1 mM PMSF, 1 mM  $\text{Na}_3\text{VO}_4$ , and 1 complete™ protease inhibitor cocktail tablet/25 mL buffer,  
468 SigmaAldrich, St Louis, MO) at 4°C for 1 hour while rotating. The lysate was then isolated via  
469 centrifugation (10 minutes at 13,793 xg) and extraction of the supernatant. Protein concentrations were then  
470 quantified using a Pierce™ Coomassie (Bradford) Protein Assay kit (ThermoFisher) according to standard  
471 protocol, after which the lysates were stored at -80°C until desired for use in immunoblotting.

472 **Cell proliferation and colony formation assay:** ALK+ALCL cell lines, DEL, SU-DHL1 and Karpas 299,  
473 DEL cells expressing vector, ACLY-WT and ACLY-Y682F mutant cells were plated at a concentration of  
474  $1 \times 10^5$  cells/well in 6 well plates. Cells were treated with DMSO, crizotinib and BMS- 303141 alone or in  
475 combination for 24, 48 and 72 hours, Cell proliferation was assessed by WST-1 assay as per manufacturer's  
476 protocol (Roche Applied Science, Indianapolis, IN, USA). Colony formation assay was performed with  
477 MethoCult methylcellulose-based media as per manufacturer's protocol (Stemcell Technologies,  
478 Vancouver, British Columbia, Canada). After 14 days, colonies were stained with iodinitrotetrazolium  
479 chloride overnight and counted as described previously<sup>5</sup>.

480 **Xenograft model:** Four-week-old male SCID-BEIGE mice (CB.17 SCID-BEIGE) (Charles River  
481 Laboratory, Wilmington, MA) were used. For each condition, a total of  $1 \times 10^7$  DEL cells expressing vector,  
482 stable ACLY-WT or 682F cells were suspended in 100  $\mu$ l of saline containing 50% Matrigel (BD  
483 Biosciences, Becton Drive, NJ) and injected subcutaneously into the flanks of mice (n=5 each). Tumor  
484 growth was monitored on alternate days until 3 weeks, and tumor volumes were estimated. All procedures  
485 involving mice were approved by the University Committee on the Use and Care of Animals (UCUCA) at  
486 the University of Michigan and conform to their relevant regulatory standards.

487 **Protein extraction and digestion for phosphoproteomic analysis:** Cells were lysed in buffer containing  
488 9 M urea/20 mM HEPES pH8.0/0.1% SDS and a cocktail of phosphatase inhibitors. Six milligrams of  
489 protein were reduced with 4.5 mM DTT and alkylated with 10 mM iodoacetamide, then digested with  
490 trypsin overnight at 37°C using an enzyme-to-protein ratio of 1/50 (w/w). Samples were desalted on a C18  
491 cartridge (Sep-Pak plus C18 cartridge, Waters). Each sample was prepared in triplicate.

492 **Phosphopeptide enrichment:** Metal oxide affinity chromatography (MOAC) was performed to enrich  
493 phosphorylated peptides and reduce the sample complexity prior to tyrosine-phosphorylated peptide  
494 immunopurification (pY-IP). We used titanium dioxide (TiO<sub>2</sub>) microparticles (Titansphere® Phos-TiO, GL  
495 Sciences Inc.). Briefly TiO<sub>2</sub> microparticles were conditioned with the buffer A (80% ACN/0.4% TFA),  
496 then equilibrated with the buffer B (75% buffer A/25% lactic acid). Peptides were loaded twice on TiO<sub>2</sub>  
497 microparticles and washed 2 times with buffer B and 3 times with buffer A. Hydrophilic phosphopeptides  
498 were eluted with 5% ammonium hydroxide solution and hydrophobic phosphopeptides were eluted with  
499 5% pyrrolidine solution. The equivalent of 5 mg of protein was further enriched for phosphorylated tyrosine  
500 peptides by overnight immunoprecipitation (pY-IP) using a cocktail of anti-phosphotyrosine antibodies  
501 (4G10, Millipore; PT-66, Sigma;p-Tyr-100, Cell Signaling Technology).

502 **Mass spectrometry analysis:** Ammonium hydroxide and pyrrolidine eluents were dried (SpeedVac) and  
503 reconstituted in 25  $\mu$ l sample loading buffer (0.1% TFA/2% acetonitrile). Eluent from phosphotyrosine  
504 immunoprecipitation was dried and reconstituted in 35  $\mu$ l of the loading buffer. An LTQ Orbitrap XL

505 (ThermoFisher) in-line with a Paradigm MS2 HPLC (Michrom Bioresources) was employed for acquiring  
506 high-resolution MS and MS/MS data. Ten microliters of the phospho-enriched peptides were loaded onto  
507 a sample trap (Captrap, Bruker-Michrom) in-line with a nano-capillary column (Picofrit, 75  $\mu\text{m}$  i.d.x 15  $\mu\text{m}$   
508 tip, New Objective) packed in-house with 10 cm of MAGIC AQ C18 reverse phase material (Michrom  
509 Bioresource). Two different gradient programs, one each for MOAC and phosphotyrosine  
510 immunoprecipitation samples, were used for peptide elution. For MOAC samples, a gradient of 5-40%  
511 buffer B (95% acetonitrile/1% acetic acid) in 135 min and 5 min wash with 100% buffer B followed by 30  
512 min of re-equilibration with buffer A (2% acetonitrile/1% acetic acid) was used. For phosphotyrosine  
513 immunoprecipitation samples, which were a much less complex mixture of peptides, 5-40% gradient with  
514 buffer B was achieved in 75 min followed by 5 min wash with buffer B and 30 min re-equilibration. Flow  
515 rate was  $\sim 0.3$   $\mu\text{l}/\text{min}$ . Peptides were directly introduced into the mass spectrometer using a nano-spray  
516 source. Orbitrap was set to collect 1 MS scan between 400-2000  $m/z$  (resolution of 30,000 @ 400  $m/z$ ) in  
517 orbitrap followed by data dependent CID spectra on top 9 ions in LTQ (normalized collision energy  $\sim 35\%$ ).  
518 Dynamic exclusion was set to 2 MS/MS acquisitions followed by exclusion of the same precursor ion for  
519 2 min. Maximum ion injection times were set to 300 ms for MS and 100 ms for MS/MS. Automatic Gain  
520 Control (AGC) was set to  $1 \times 10^6$  for MS and 5000 for MS/MS. Charge state screening was enabled to discard  
521 +1 and unassigned charge states. Technical duplicate data for each of the MOAC elutions (ammonium  
522 hydroxide and pyrrolidine) and triplicate data for the phosphotyrosine immunoprecipitation samples were  
523 acquired.

524 **Bioinformatics analysis:** RAW mass spectrometric data were analyzed in MaxQuant environment (version  
525 1.5.3.30) and employed Andromeda for database search<sup>27</sup> The MS/MS spectra were matched against the  
526 human Uniprot FASTA database downloaded on 04/27/2016. Enzyme specificity was set to trypsin and a  
527 maximum of 2 missed cleavages. Carbamidomethylation of cysteine was set as a fixed modification while  
528 methionine oxidation, protein N-acetylation and serine/threonine/tyrosine phosphorylation were set as  
529 variable modifications. The required false discovery rate (FDR) was set to 1% both for peptide and protein

530 levels. In addition, “match between runs” option with a window of 1.5 minute was allowed. Log2-  
531 transformed centered intensities of phosphopeptides were used for further analysis.

532 **Statistical analysis:** Statistical analysis and graphical presentation was performed using GraphPad Prism  
533 4.0.

534

535 References

- 536 1 Vander Heiden, M. G. Targeting cancer metabolism: a therapeutic window opens. *Nat Rev Drug*  
537 *Discov* **10**, 671-684, doi:10.1038/nrd3504 (2011).
- 538 2 Hatzivassiliou, G. *et al.* ATP citrate lyase inhibition can suppress tumor cell growth. *Cancer Cell*  
539 **8**, 311-321, doi:10.1016/j.ccr.2005.09.008 (2005).
- 540 3 Jones R.G and Thompson C.B. Tumor suppressors and cell metabolism: a recipe for cancer  
541 growth. *Genes Dev.* 2009 Mar 1;23(5):537-48.
- 542 4 Wellen K.E, Hatzivassiliou G, Sachdeva U.M, Bui T.V, Cross J.R, Thompson C.B. ATP-citrate  
543 lyase links cellular metabolism to histone acetylation. *Science.* 2009 May 22;324(5930):1076-  
544 80.
- 545 5 Bauer D.E, Hatzivassiliou G, Zhao F, Andreadis C, Thompson C.B. ATP citrate lyase is an  
546 important component of cell growth and transformation. *Oncogene.* 2005 Sep 15;24(41):6314-  
547 22.
- 548 6 Currie E, Schulze A, Zechner R, Walther TC, Farese R.V Jr. Cellular fatty acid metabolism and  
549 cancer. *Cell Metab.* 2013 Aug 6;18(2):153-61. *Cancer Cell.* 2005 Oct;8(4):311-21.
- 550 7 Wei J, Leit S, Kuai J, Therrien E, Rafi S, Harwood H.J Jr, DeLaBarre B, Tong L. An allosteric  
551 mechanism for potent inhibition of human ATP-citrate lyase. *Nature.* 2019 Apr;568(7753):566-  
552 570. doi: 10.1038/s41586-019-1094-6.
- 553 8 Verschuere K.H.G, Blanchet C, Felix J, Dansercoer A, De Vos D, Bloch Y, Van Beeumen J,  
554 Svergun D, Gutsche I, Savvides S.N, Verstraete K. Structure of ATP citrate lyase and the origin  
555 of citrate synthase in the Krebs cycle. *Nature.* 2019 Apr;568(7753):571-575. doi:  
556 10.1038/s41586-019-1095-5.

- 557 9 Lin R, Tao R, Gao X, Li T, Zhou X, Guan K, Xiong Y, Lei Q.Y. Acetylation stabilizes ATP-citrate  
558 lyase to promote lipid biosynthesis and tumor growth. *Mol Cell*. 2013 Aug 22;51(4):506-518.
- 559 10 Osinalde N, Mitxelena J, Sánchez-Quiles V, Akimov V, Aloria K, Arizmendi JM, Zubiaga AM,  
560 Blagoev B, Kratchmarova I. Nuclear Phosphoproteomic Screen Uncovers ACLY as Mediator of  
561 IL-2-induced Proliferation of CD4+ T lymphocytes. *Mol Cell Proteomics*. 2016 Jun;15(6):2076-  
562 92.
- 563
- 564 11 Lee J.V, Carrer A, Shah S, Snyder N.W, Wei S, Venneti S, Worth A.J, Yuan ZF, Lim H.W, Liu  
565 S, Jackson E, Aiello N.M, Haas N.B, Rebbeck T.R, Judkins A, Won K.J, Chodosh L.A, Garcia  
566 B.A, Stanger B.Z, Feldman M.D, Blair I.A and Wellen K.E. Akt-dependent metabolic  
567 reprogramming regulates tumor cell histone acetylation. *Cell Metab*. 2014 Aug 5; 20(2): 306–  
568 319.
- 569 12 Blume-Jensen P, Hunter T. Oncogenic kinase signalling. *Nature*. 2001;411:355–365.
- 570 13 McDonnell, S. R. *et al*. Integrated phosphoproteomic and metabolomic profiling reveals NPM-  
571 ALK-mediated phosphorylation of PKM2 and metabolic reprogramming in anaplastic large cell  
572 lymphoma. *Blood* **122**, 958-968, doi:10.1182/blood-2013-01-482026 (2013).
- 573 14 McDonnell, S. R. *et al*. NPM-ALK signals through glycogen synthase kinase 3beta to promote  
574 oncogenesis. *Oncogene* **31**, 3733-3740, doi:10.1038/onc.2011.542 (2012).
- 575 15 Boccalatte, F. E. *et al*. The enzymatic activity of 5-aminoimidazole-4-carboxamide ribonucleotide  
576 formyltransferase/IMP cyclohydrolase is enhanced by NPM-ALK: new insights in ALK-  
577 mediated pathogenesis and the treatment of ALCL. *Blood* **113**, 2776-2790, doi:10.1182/blood-  
578 2008-06-161018 (2009).

- 579 16 Motegi, A., Fujimoto, J., Kotani, M., Sakuraba, H. & Yamamoto, T. ALK receptor tyrosine  
580 kinase promotes cell growth and neurite outgrowth. *J Cell Sci* **117**, 3319-3329,  
581 doi:10.1242/jcs.01183 (2004).
- 582 17 Ren, H. *et al.* Identification of Anaplastic Lymphoma Kinase as a Potential Therapeutic Target in  
583 Ovarian Cancer. *Cancer Research* **72**, 3312-3323, doi:10.1158/0008-5472.Can-11-3931 (2012).
- 584 18 Srere, P. A. The citrate cleavage enzyme. I. Distribution and purification. *J Biol Chem* **234**, 2544-  
585 2547 (1959).
- 586 19 Hallberg, B. & Palmer, R. H. Mechanistic insight into ALK receptor tyrosine kinase in human  
587 cancer biology. *Nat Rev Cancer* **13**, 685-700, doi:10.1038/nrc3580 (2013).
- 588 20 Koivunen, J. P. *et al.* EML4-ALK fusion gene and efficacy of an ALK kinase inhibitor in lung  
589 cancer. *Clin Cancer Res* **14**, 4275-4283, doi:10.1158/1078-0432.CCR-08-0168 (2008).
- 590 21 Del Grosso, F. *et al.* Inhibition of N-linked glycosylation impairs ALK phosphorylation and  
591 disrupts pro-survival signaling in neuroblastoma cell lines. *BMC Cancer* **11**, 525,  
592 doi:10.1186/1471-2407-11-525 (2011).
- 593 22 Montavon, G. *et al.* Wild-type ALK and activating ALK-R1275Q and ALK-F1174L mutations  
594 upregulate Myc and initiate tumor formation in murine neural crest progenitor cells. *Oncotarget*  
595 **5**, 4452-4466, doi:10.18632/oncotarget.2036 (2014).
- 596 23 Shaw, A. T. *et al.* Resensitization to Crizotinib by the Lorlatinib ALK Resistance Mutation  
597 L1198F. *N Engl J Med* **374**, 54-61, doi:10.1056/NEJMoa1508887 (2016).
- 598 24 Lochner, M., Berod, L. & Sparwasser, T. Fatty acid metabolism in the regulation of T cell  
599 function. *Trends Immunol* **36**, 81-91, doi:10.1016/j.it.2014.12.005 (2015).



- 600 25 Nguyen, V. *et al.* A New Approach for Quantitative Phosphoproteomic Dissection of Signaling  
601 Pathways Applied to T Cell Receptor Activation. *Mol Cell Proteomics* **8**, 2418-2431,  
602 doi:10.1074/mcp.M800307-MCP200 (2009).
- 603 26 Caro, P. *et al.* Metabolic signatures uncover distinct targets in molecular subsets of diffuse large  
604 B cell lymphoma. *Cancer cell* **22**, 547-560, doi:10.1016/j.ccr.2012.08.014 (2012).
- 605 27 Heiden, M. G. V., Cantley, L. C. & Thompson, C. B. Understanding the Warburg Effect: The  
606 Metabolic Requirements of Cell Proliferation. *Science* **324**, 1029-1033,  
607 doi:10.1126/science.1160809 (2009).
- 608 28 Zhao, H. *et al.* Tumor microenvironment derived exosomes pleiotropically modulate cancer cell  
609 metabolism. *Elife* **5**, doi:10.7554/eLife.10250 (2016).
- 610 29 Rabinowitz, J. D. & Collier, H. A. Partners in the Warburg effect. *Elife* **5**,  
611 doi:10.7554/eLife.15938 (2016).
- 612 30 Wang, D., Green, M. F., McDonnell, E. & Hirschey, M. D. Oxygen flux analysis to understand  
613 the biological function of sirtuins. *Methods Mol Biol* **1077**, 241-258, doi:10.1007/978-1-62703-  
614 637-5\_16 (2013).
- 615 31 Ma, Z., Chu, C. H. & Cheng, D. A novel direct homogeneous assay for ATP citrate lyase. *J Lipid*  
616 *Res* **50**, 2131-2135, doi:10.1194/jlr.D900008-JLR200 (2009).
- 617
- 618
- 619

620  
621  
622  
623  
624  
625  
626  
627  
628  
629  
630  
631  
632  
633  
634  
635  
636  
637  
638  
639  
640  
641  
642  
643  
644  
645

**Acknowledgments:**

We thank Kristina Fields, University of Michigan for her excellent IHC work. This work was supported by the University of Michigan Cancer Center Pilot Grant, the Department of Pathology, University of Michigan and R01 CA140806-01 (MSL), R01 DE119249, R01 CA136905 (KSJ-EJ).

**Author contributions:**

J.V.B., M.S.L. and K.S.J.E-J., conceived the project, designed the experiments, and wrote the manuscript. J.V.B., M.A and C.F.B. designed the metabolomics experiments, M.A performed the mass spectrometry for identification of metabolites, D.C.M.R, V.B and K.C performed phosphoproteomic analyses. S.S. performed *in-silico* modeling and molecular docking studies. G.B., S.R.H., Z.N., V.M, A.S, K.M.,and T.V performed molecular biology experiments, L.Z., Y.Z. and R.B.F. performed bioinformatics analyses, N.G.B and J.K.F evaluated IHC, C.F.B provided the critical reagents and resource for metabolomics study, D.C., J.M.P. and J.L.R performed human T cells transduction experiments, A.D.A generated crizotinib resistant ALK+ cell lines, J.H.S., R.M., K.E.W provided the critical insights and reagents, K.E.J and M.L supervised and oversaw the study. All authors discussed the results and commented on the manuscript.

646 **Figure legends:**

647 **Figure 1:** NPM-ALK interacts with ACLY and phosphorylates on Y682 residue in ALK+ALCLs.

648 a, Western blot analyses of pACLY, ACLY in ALK+ALCL and ALK- negative T-cell lymphoma. b,  
649 Immunohistochemical expression of pACLY Y682 (lower panel) in human primary ALK+ALCL (right  
650 panel) and ALK- T cell lymphoma biopsy samples (left panel). c, DEL stable cell lines expressing vector,  
651 ACLY-WT and ACLY-Y682F. d, HEK293T cells transfected with vector, active NPM-ALK and kinase-  
652 defective NPM-ALK (K210R). e, Human primary CD4+ cells transduced with active NPM-ALK and  
653 kinase-defective NPM-ALK (K210R). f. ALK+ALCL cell lines SU-DHL1 and DEL cells treated with  
654 small molecule inhibitor of ALK, crizotinib 300 nM or DMSO for 6 hours. g. ALK+ neuroblastoma cell  
655 line NB1 treated with small molecule inhibitor of ALK, crizotinib or DMSO for 6 hours. h. HEK293T cells  
656 co-transfected with ACLY-WT, ACLY-Y682F alone with active NPM-ALK and lysates were  
657 immunoprecipitated (IP) with ALK antibody. i, Reciprocal IP with anti-HA from the previous samples and  
658 probed with indicated antibodies. j, SU-DHL1 cell lysates were immunoprecipitated with ALK antibody  
659 and probed with ACLY. k,l, Stimulation of EGFR positive cells with EGF induces ACLY Y682  
660 phosphorylation in HeLa cells and A549 cells. m, Stimulation of human primary T-cells with anti-  
661 CD3/CD4 increases ACLY Y682 phosphorylation

662 **Figure 2:** Oncogenic ALK and other tyrosine kinases directly phosphorylate ACLY Y682

663 a, *In vitro kinase* assay using immunoprecipitated NPM-ALK from ALK+ALCL cell lines and purified  
664 ACLY-WT and Y682F proteins. b, *In vitro kinase* assay using immunoprecipitated EML4-ALK from  
665 ALK+ non-small cell lung cancer (NSCLC) cell lines and purified ACLY-WT and Y682F proteins. c, *In*  
666 *vitro kinase* assay using purified wild type ALK, ALK C1156Y (mutation in EML4-ALK) and ALK  
667 R1275Q (mutation in neuroblastoma). d, *In vitro kinase* assay using purified wild type ALK, ALK  
668 C1156Y (mutation in EML4-ALK) and ALK R1275Q (mutation in neuroblastoma). The bar graph  
669 represents the relative intensity of the specific bands of pACLY Y682, which are normalized to the value  
670 of pALK Y1604 level. e, *In vitro kinase* assay using SRC kinase, f, JAK2 kinase, g, ROS1 kinase and h,

671 LTK kinase. Error bars represent mean values  $\pm$  standard deviation from three independent experiments  
672 (\*,  $P < 0.05$ , \*\*,  $P < 0.005$ ).

673 **Figure 3: Tyrosine phosphorylation of ACLY increases its activity and lipid metabolism**

674 a, ACLY activity assay on SU-DHL1 cells treated with ALK inhibitor crizotinib and ACLY inhibitor  
675 BMS 303142. b, ACLY activity assay on DEL cells treated with ALK inhibitor crizotinib and ACLY  
676 inhibitor BMS 303142. c, ACLY activity assay on DEL cells stably expressed ACLY-WT and ACLY-  
677 Y682F constructs. d, ACLY activity assay on HEK293T cells transfected with active NPM-ALK and  
678 inactive NPM-ALK. e, Schematic representations depicting the flux analysis of  $^{13}\text{C}$ -glucose. f,  $^{13}\text{C}$   
679 incorporation in glucose-derived metabolite of citrate in ALK+ALCL cell line (DEL). g,  $^{13}\text{C}$   
680 incorporation in glucose-derived metabolite of acetyl-CoA. h,  $^{13}\text{C}$  incorporation in glucose-derived  
681 metabolite of citrate in DEL cells stably expressing ACLY-WT and ACLY-Y682F.  $^{13}\text{C}$  enrichment in  
682 glucose-derived metabolite of citrate. i,  $^{13}\text{C}$  enrichment in glucose-derived metabolite of acetyl-CoA. j,  
683 Schematic depicting the flux analysis of  $^{13}\text{C}$ -glucose and number of carbons labeled (red circles) in fatty  
684 acid synthesis. k,  $^{13}\text{C}$  enrichment in  $^{13}\text{C}$ -glucose-derived  $^{13}\text{C}$ -palmitate labeling in DMSO and crizotinib  
685 treated ALK+ALCL cell line. l,  $^{13}\text{C}$  enrichment in  $^{13}\text{C}$ -glutamine-derived  $^{13}\text{C}$ -palmitate labeling in DMSO  
686 and crizotinib treated ALK+ALCL cell line. m,  $^{13}\text{C}$  enrichment in  $^{13}\text{C}$ -glucose-derived  $^{13}\text{C}$ -palmitate  
687 labeling in ACLY-WT and ACLY-Y682F stably transduced DEL, ALK+ALCL cell line. n,  $^{13}\text{C}$   
688 enrichment in  $^{13}\text{C}$ -glutamine-derived  $^{13}\text{C}$ -palmitate labeling in ACLY-WT and ACLY-Y682F stably  
689 transduced DEL, ALK+ALCL cell line. Mean  $\pm$  SEM of triplicates (\*,  $P < 0.05$ , \*\*,  $P < 0.005$ ).

690

691 **Figure 4: Tyrosine phosphorylation of ACLY regulates cell proliferation and tumor growth**

692 a-c, Cell proliferation of ALK+ALCL cell lines treated with DMSO, ALK inhibitor (crizotinib) and  
693 ACLY inhibitor (BMS 303141) using WST-1 assay. a, DEL, b, SUPM2 crizotinib sensitive, c, SUPM2  
694 crizotinib resistant d, Cell proliferation of DEL cells stably expressing vector, ACLY-WT and ACLY-

695 Y682F using WST-1 assay. e, Methylcellulose colony formation assay using DEL cells stably expressing  
696 vector, ACLY-WT and ACLY-Y682F. f, Samples analyzed in triplicate, with a representative image (e)  
697 and bar graph. g, Representative images of tumors derived from DEL cells stably expressing vector,  
698 ACLY-WT and ACLY-Y682F arising from  $1 \times 10^7$  cells xenografted into SCID-beige mice. h, Tumor  
699 volumes of xenografts derived from DEL cells stably expressing vector, ACLY-WT and ACLY-Y682F in  
700 SCID-beige mice. i, Kaplan-Meier survival curves of ALK+ ALCL (DEL) xenografts in SCID-BEIGE  
701 mice. j, Schematic summary: Multiple tyrosine kinases phosphorylate ACLY Y682 to regulate its  
702 enzymatic activity and promote lipid metabolism and tumor growth.

703 **Extended Data Figure 1: NPM-ALK regulates phosphorylation of ACLY Y682.**

704 **a**, Heat map showing correlation between normalized mass spectral intensity of tyrosine phosphopeptide  
705 residues across eighteen lymphoma cell lines. Pearson correlation of the normalized phosphopeptide  
706 intensities of 359 tyrosine residues measured in at least 3 cell lines. pACLY Y682 and pALK Y1604 are  
707 highly correlated as shown in the bottom right (red) cluster on the heatmap. **b**, Reduction of pACLY Y682  
708 phosphopeptide intensity in ALK+ cell line (SU-DHL-1) treated with small molecule inhibitor CEP-26939  
709 when compared to DMSO. **c**, The average normalized intensities of various ALK tyrosine phosphorylated  
710 residues in DMSO and CEP-26939 treated SU-DHL-1. ALK+ALCL cell lines (n=3) were processed for  
711 phosphopeptide enrichment and analyzed by MS/MS. ( $p < 0.05$  \*\* and  $p < 0.01$  \*\*\*). The bar graph also  
712 shows reduced phosphopeptide intensities of known ALK tyrosine kinase substrates such as PKM2, SHC1  
713 and WDR1. ( $p < 0.05$  \*\*,  $p < 0.01$  \*\*\*) following ALK inhibition **d**, HA-tagged ACLY-WT was expressed  
714 in 293T cells with active NPM-ALK or kinase-defective NPM-ALK-K210R, immunoprecipitated (IP) with  
715 HA and resolved on 4-20% NuPAGE for phosphoproteomic studies. **e**, Representative MS/MS spectrum  
716 of ACLY Y682 phosphorylated peptide revealed by phosphoproteomic analysis. Phosphopeptides isolated  
717 through MOAC followed by pY-antibody immunoprecipitation were resolved on a reverse phase column  
718 and collision induced dissociation spectra were obtained using LTQ Orbitrap XL mass spectrometer. **A**  
719 MS/MS spectrum corresponding to  $^{677}\text{TTDGVYEGVAIGGDR}^{691}$  of ACLY (precursor  $m/z$   $[\text{M}+\text{H}]^{+2} =$

720 795.35) is shown. Observed b- and y-ions are indicated. g, Illustration of ACLY Y682 protein sequence  
721 homology in multiple species. f, ACLY Y682 site is conserved in all speicies. g, Immunoblotting of ACLY-  
722 WT, ACLY-Y131F and ACLY-Y682F mutant constructs expressed in HEK293T cells with indicated  
723 antibodies. h, *In vitro* kinase assays of ACLY-WT, ACLY-Y131 and ACLY-Y682F recombinant proteins  
724 using endogenous NPM-ALK immunoprecipitated with anti-ALK antibody from ALK+ALCL cell line.

725 **Extended data Figure 2:**

726 a, Reduction of pACLY Y682 phosphopeptide intensity in ALK+ cell line (SU-DHL-1) treated with small  
727 molecule inhibitor crizotinib when compared to DMSO. b, The average normalized intensities of various  
728 ALK tyrosine phosphorylated residues in DMSO and crizotinib treated SU-DHL-1. ALK+ALCL cell lines  
729 (n=3) were processed for phosphopeptide enrichment and analyzed by MS/MS. ( $p < 0.05$  \*\* and  $p < 0.01$   
730 \*\*\*).The bar graph also shows reduced phosphopeptide intensities of known ALK tyrosine kinase  
731 substrates such as PKM2, SHC1 and WDR1. ( $p < 0.05$  \*\*,  $p < 0.01$  \*\*\*) following ALK inhibition

732 **Extended Data Figure 3:** Multiple oncogenic tyrosine kinases regulate ACLY Y682 phosphorylation in  
733 human cancer.

734 a, EML4-ALK positive cells (crizotinib H1322 sensitive and clone 2;crizotinib resistant) were treated with  
735 DMSO and crizotinib and the lysates were immunoblotted with indicated antibodies. b, Representative  
736 image of immunohistochemistry (IHC) of EML4-ALK positive lung cancer biopsy sample (N=5) probed  
737 with pACLY Y682. c, Immunohistochemistry of HER-2 amplified breast cancer biopsy probed with  
738 pACLY Y682. d, Immunohistochemistry of EGFR mutated lung cancer biopsy probed with pACLY Y682.  
739 f, Immunohistochemistry of CD74-ROS1 positive lung cancer biopsy probed with pACLY Y682.

740 **Extended Data Figure 4:** Tyrosine phosphorylation of ACLY attenuates fatty acid oxidation in  
741 ALK+ALCL cell lines

742 a, Schematic representations depicting the flux analysis of  $^{13}\text{C}$ -glucose in SUD-HL1 cells. b, Increased  $^{13}\text{C}$   
743 incorporation in glucose-derived metabolite of citrate in crizotinib treated ALK+ALCL cell line (SUD-  
744 HL1). c, Decreased  $^{13}\text{C}$  incorporation in glucose-derived metabolite of acetyl-CoA. d, Decreased  $^{13}\text{C}$   
745 incorporation in glucose-derived metabolite of malonyl-CoA. e, Schematic representations depicting the  
746 flux analysis of  $^{13}\text{C}$ -oleic acid in DEL cells stably expressing ACLY-WT and ACLY-Y682F constructs.  
747 glucose enrichment in glucose-derived metabolite of acetyl-CoA. f, +2 citrate metabolite levels. g,  
748 enrichment of oleyol carnitine +18 in ACLY-Y682F cells. h, Measure of oxygen consumption rate (OCR)  
749 using seahorse in ACLY-WT and ACLY-Y682F expressing cells. Mean  $\pm$  SEM of triplicates (\*,  $P < 0.05$ ,  
750 \*\*,  $P < 0.005$ ).

751

752

Figure 1

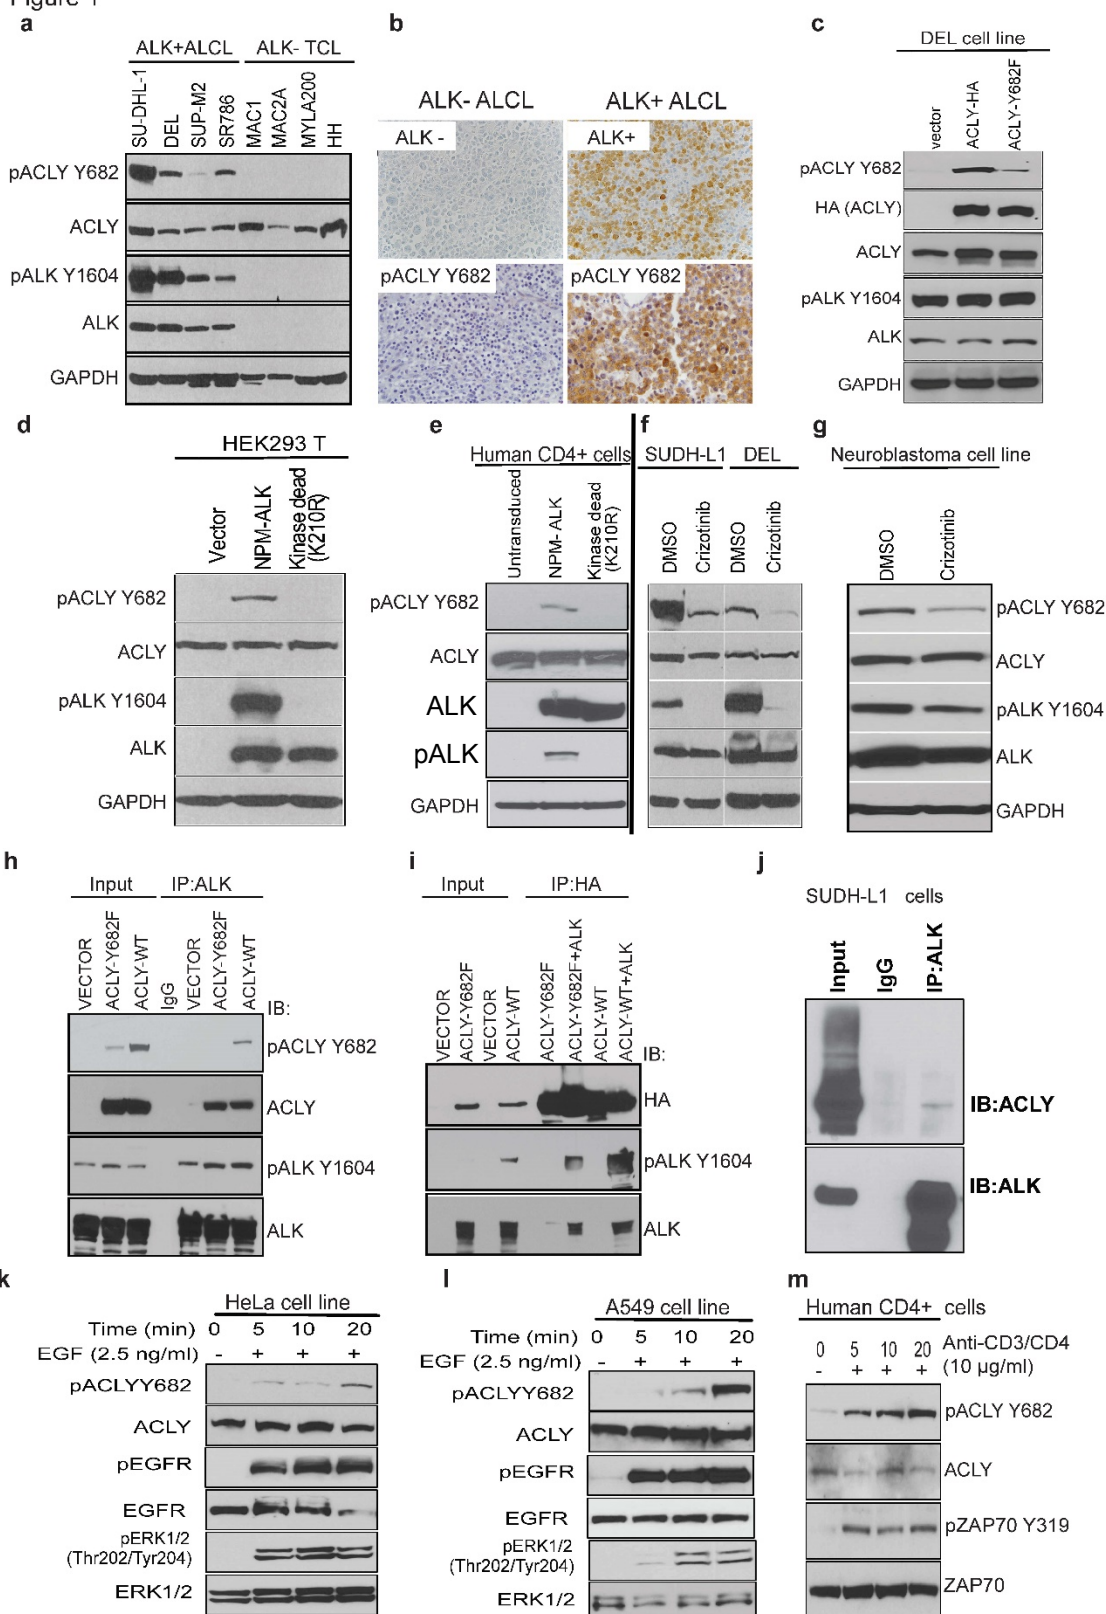



Figure 2

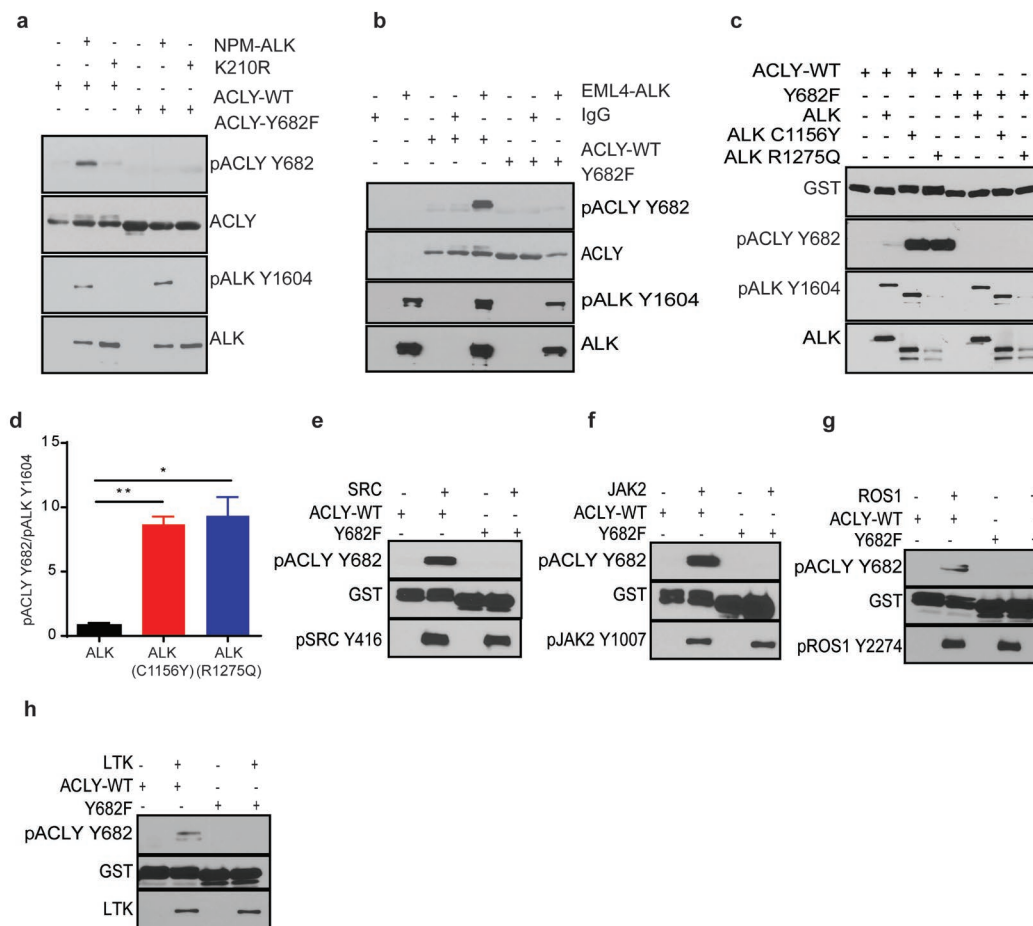

Figure 3

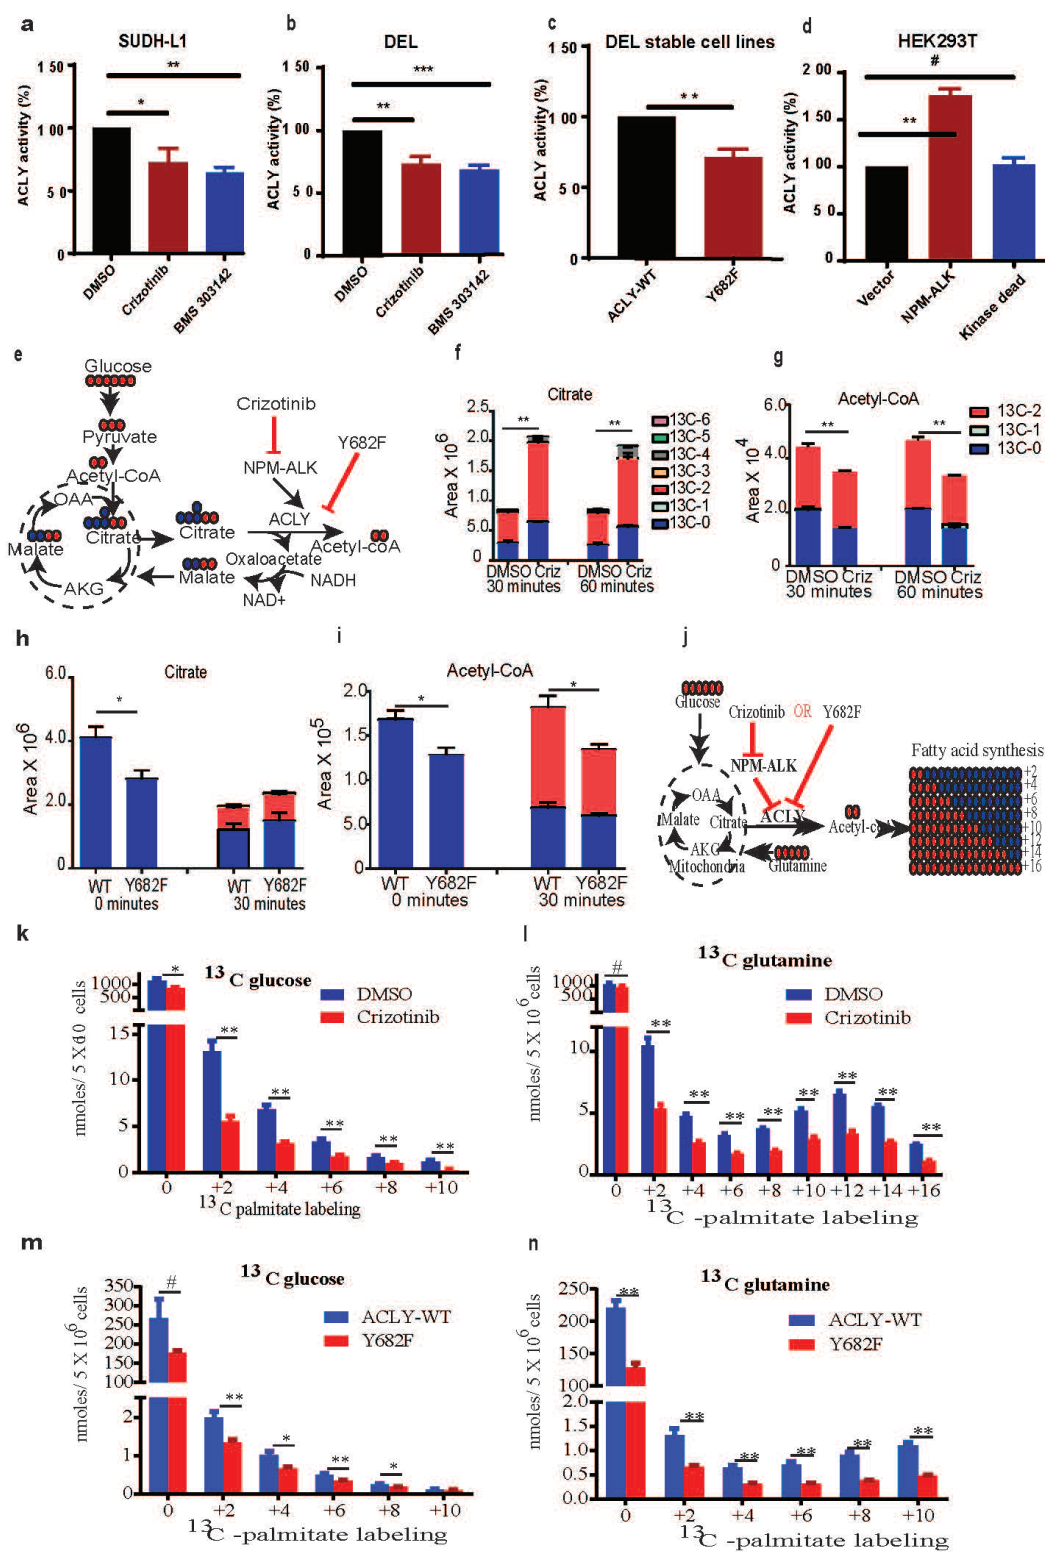

Figure 4

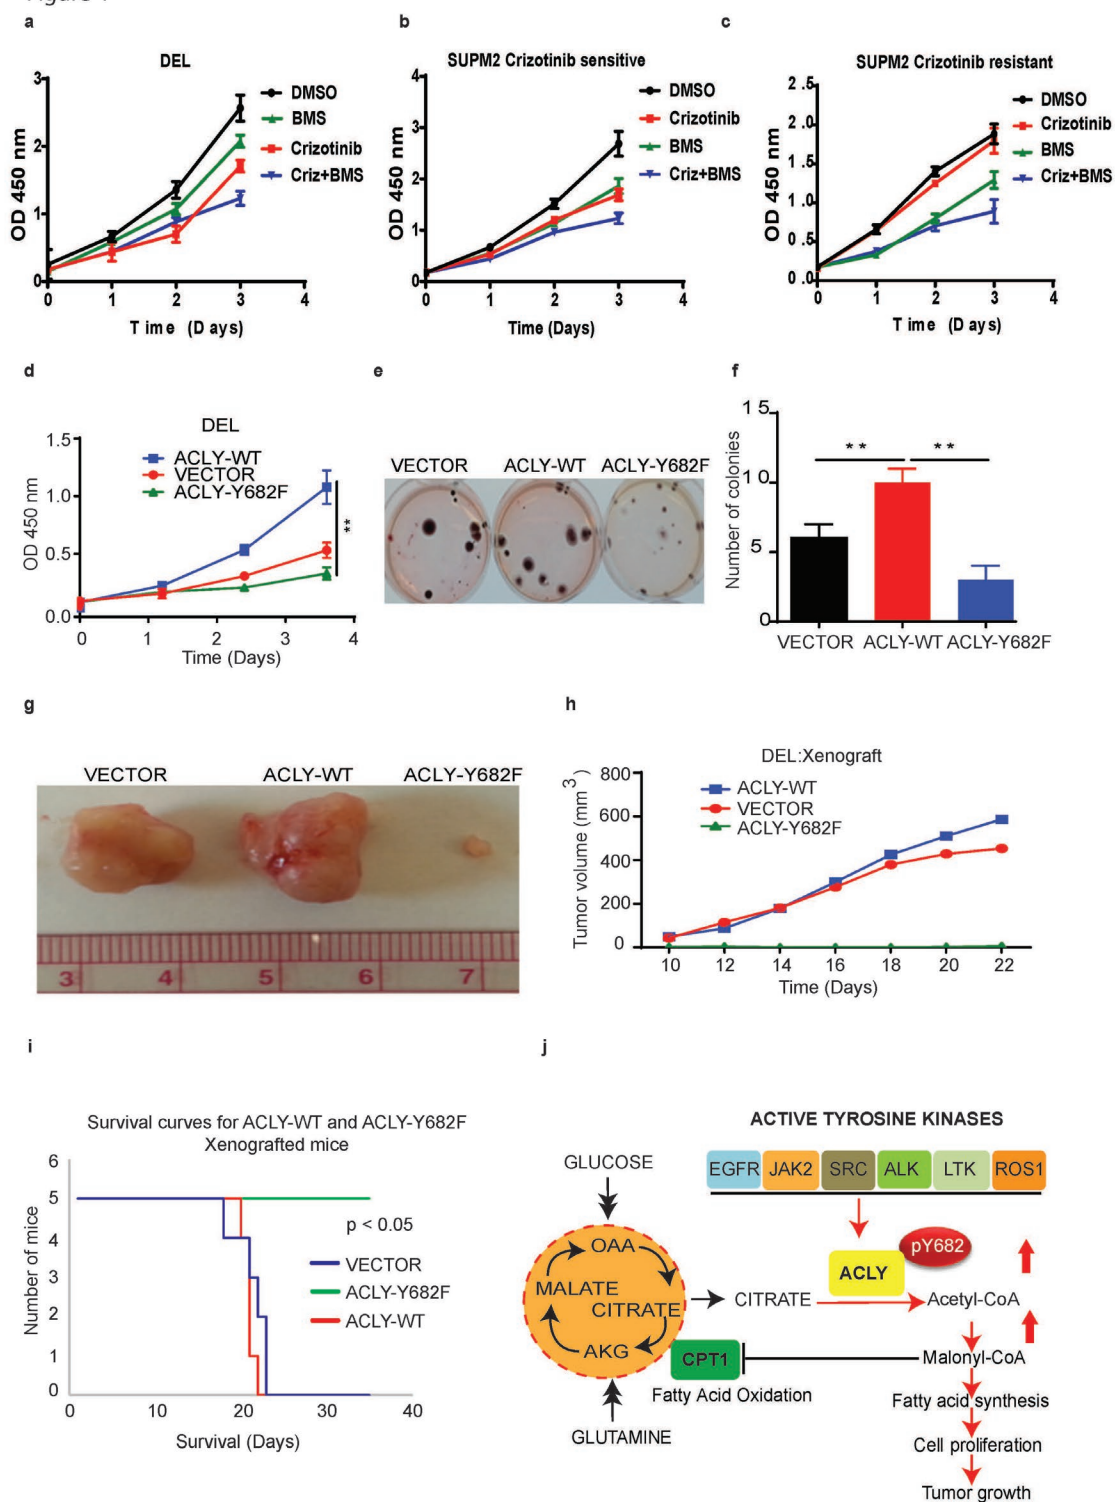

Extended Data Fig.1a

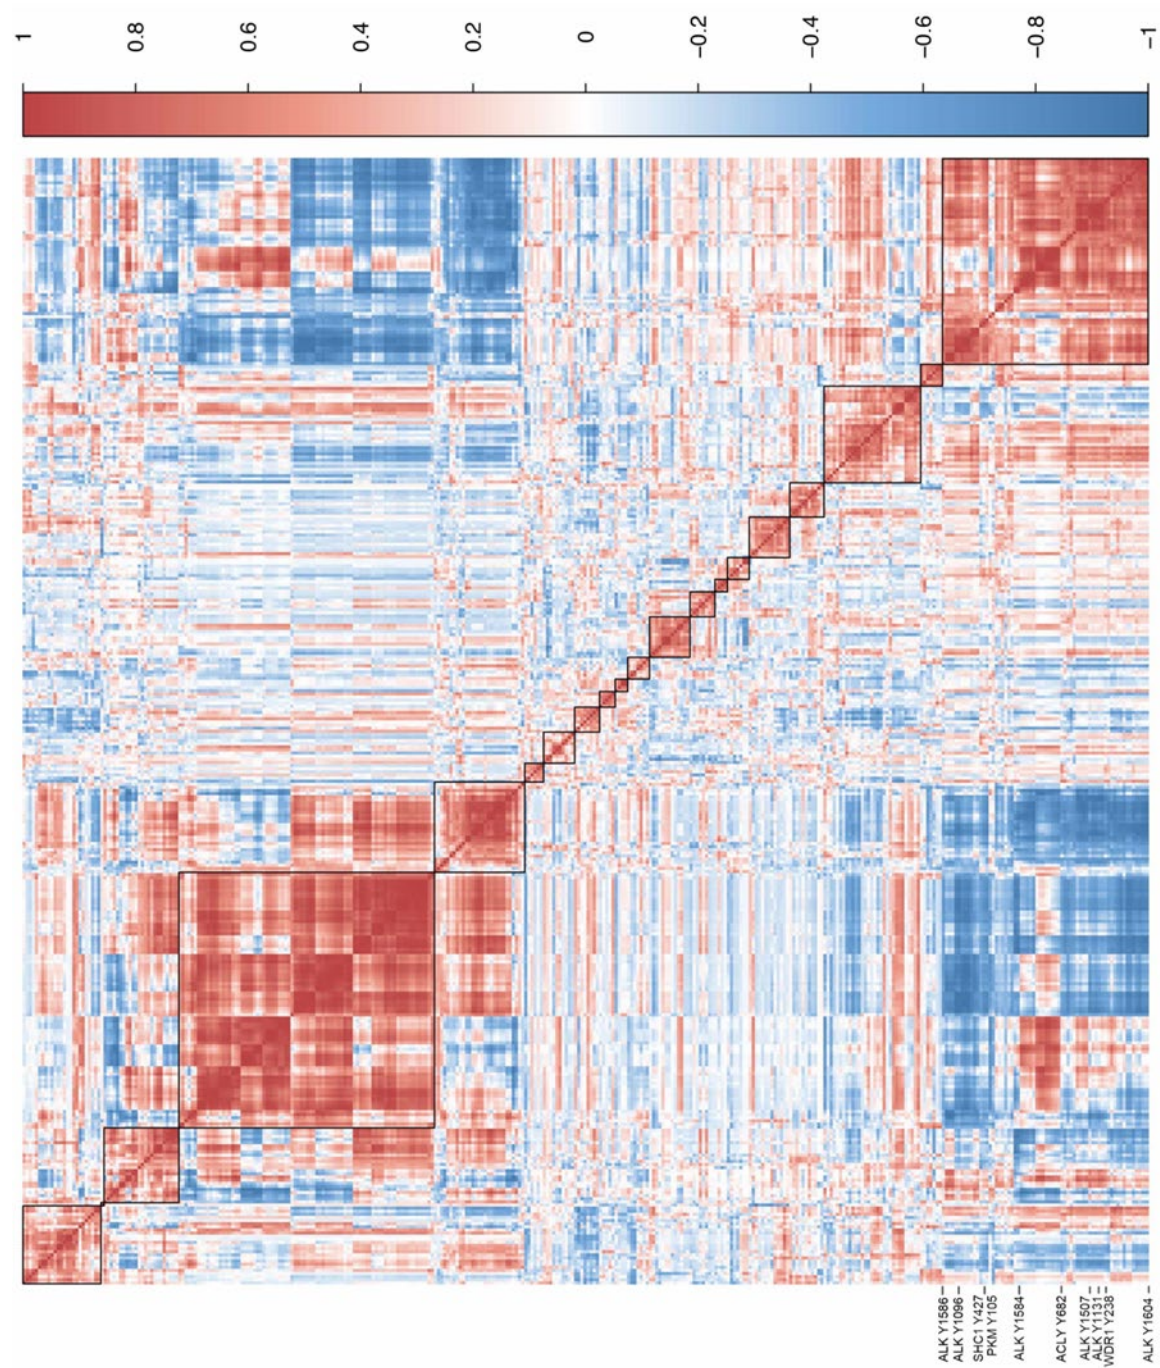

Extended Data Figure 1

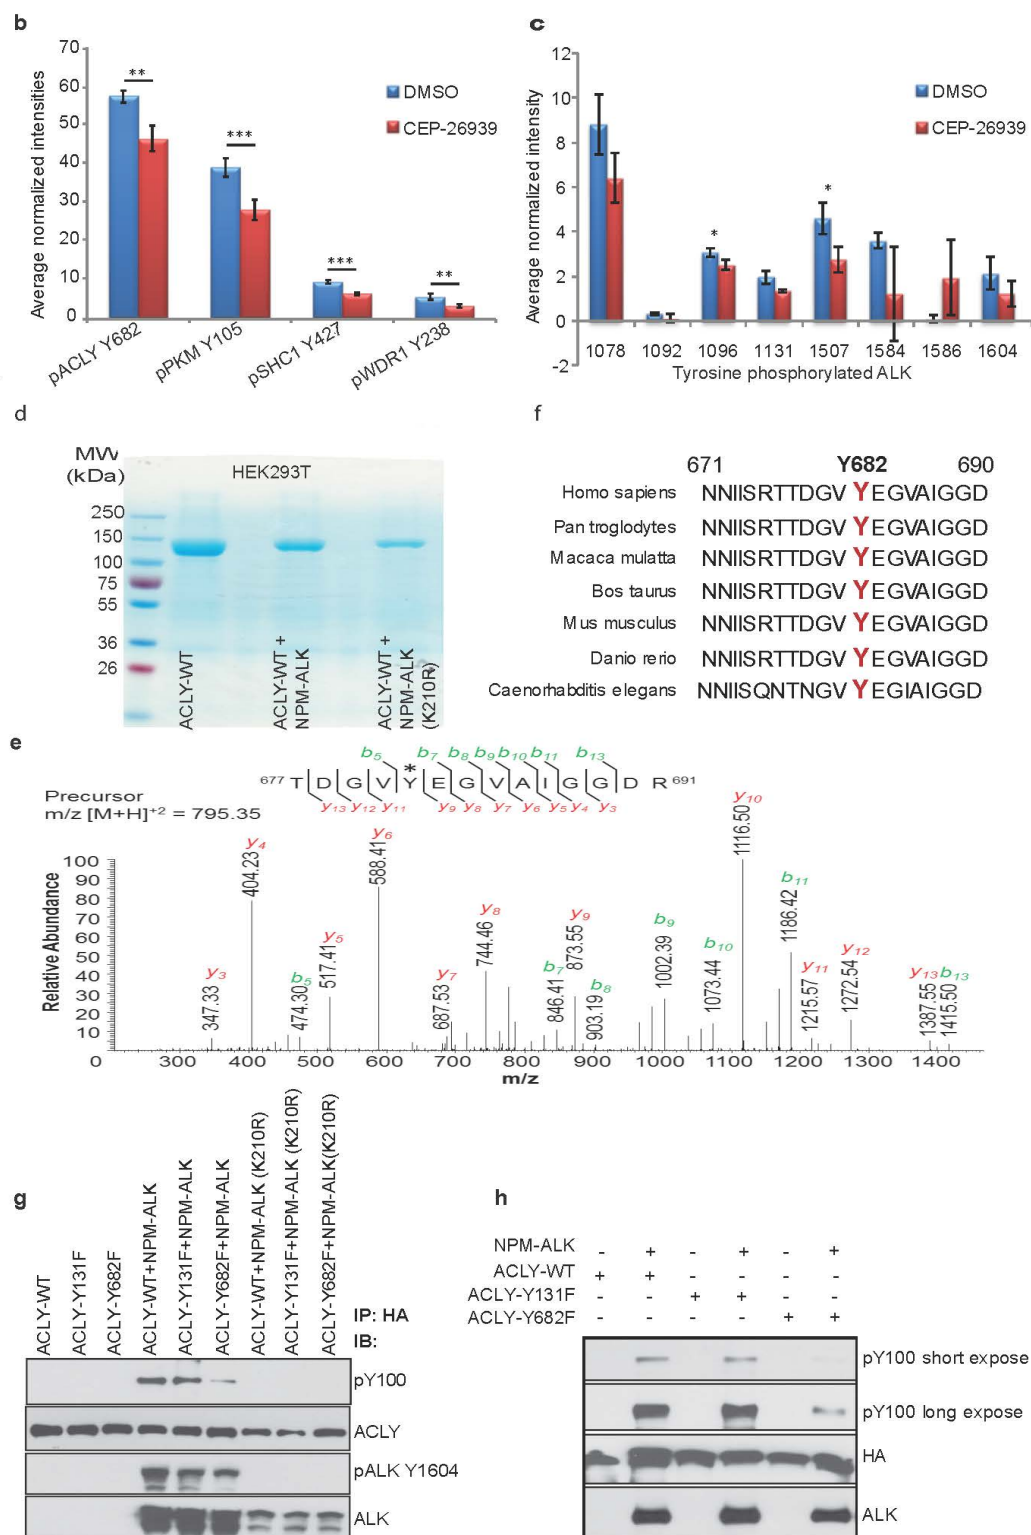

Extended Data Figure 2

a

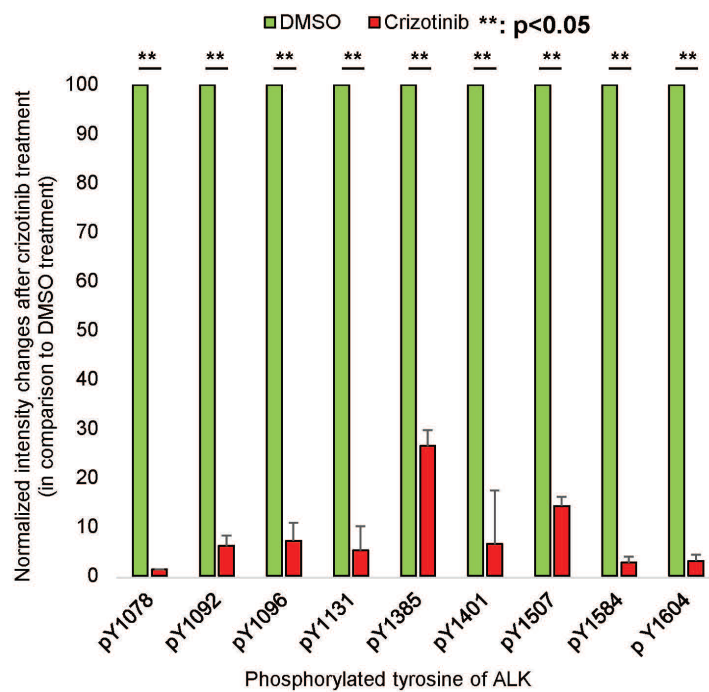

b

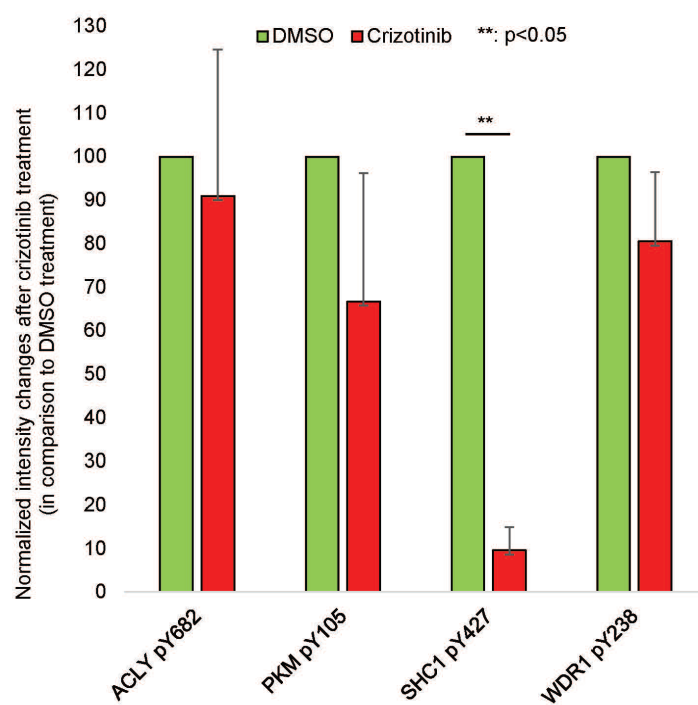

Extended Data Figure 3

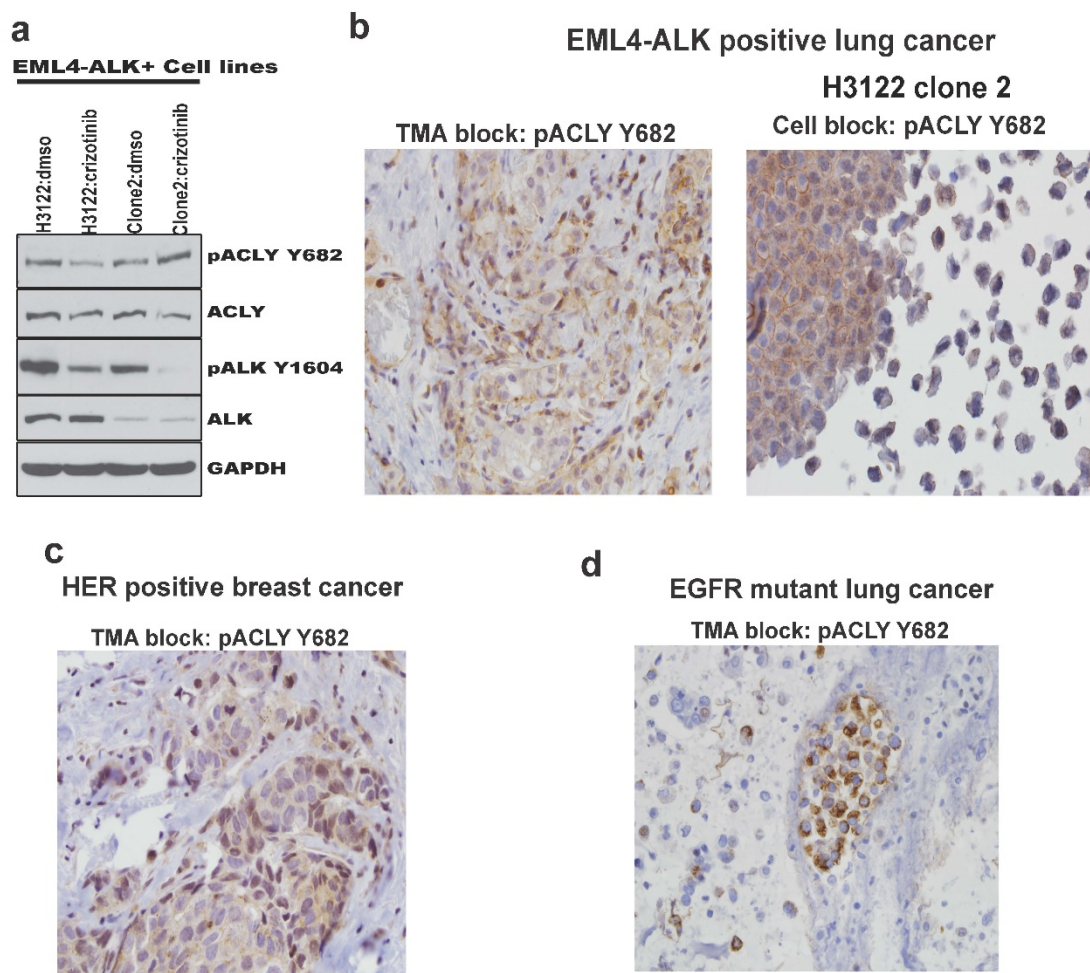

Extended Data Figure 4

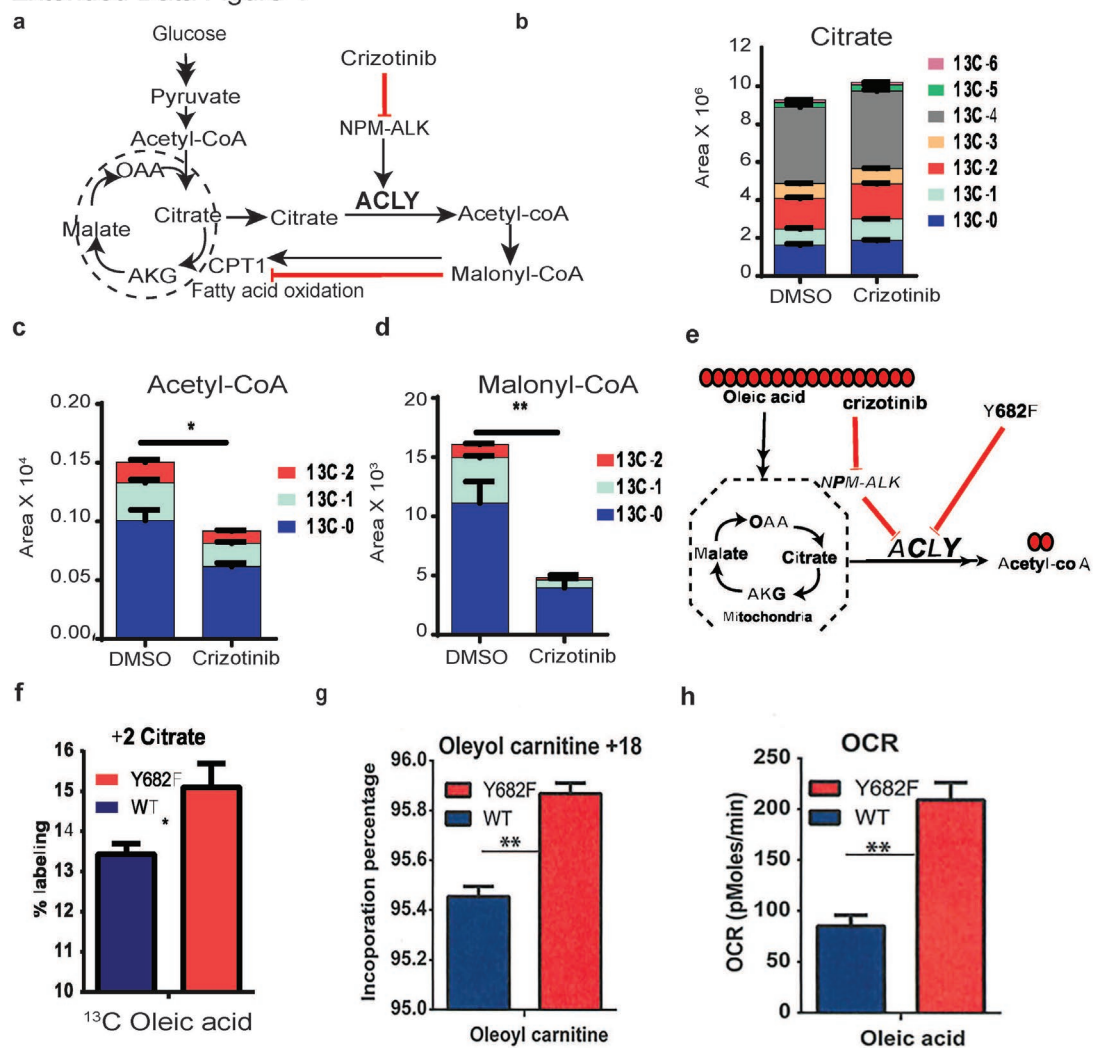

Source: https://www.biorxiv.org/content/biorxiv/early/2020/01/20/2020.01.20.910752.full.pdf
